# Supplementary material
Source: ML conference proceedings conference paper supplement (https://openreview.net/forum?id=KsmlBRhLgs)
Supplement: supplementary_material [file Fig3.pdf › figures/Fig3.pdf]

## Delay Occurrence

env step 0

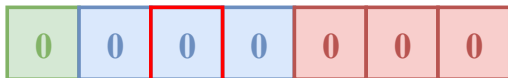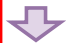

env step 1

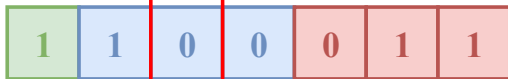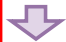

env step 2

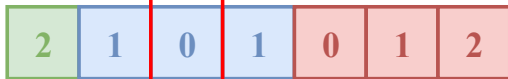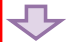

env step 3

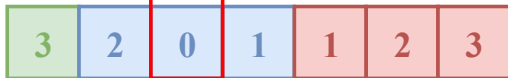

## Delay Compensation

cmp step 3

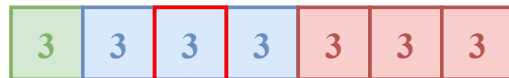

cmp step 2

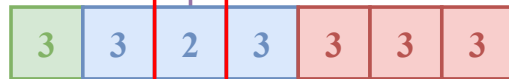

cmp step 1

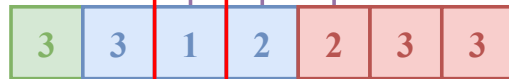

cmp step 0

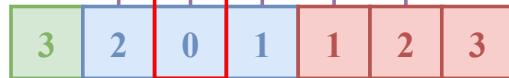

3-step delay corresponds to 3-step compensation
