# Supplementary material
Source: ML conference proceedings conference paper supplement (https://openreview.net/forum?id=KsmlBRhLgs)
Supplement: supplementary_material [file FigD1.pdf › figures/FigD1.pdf]

TAG

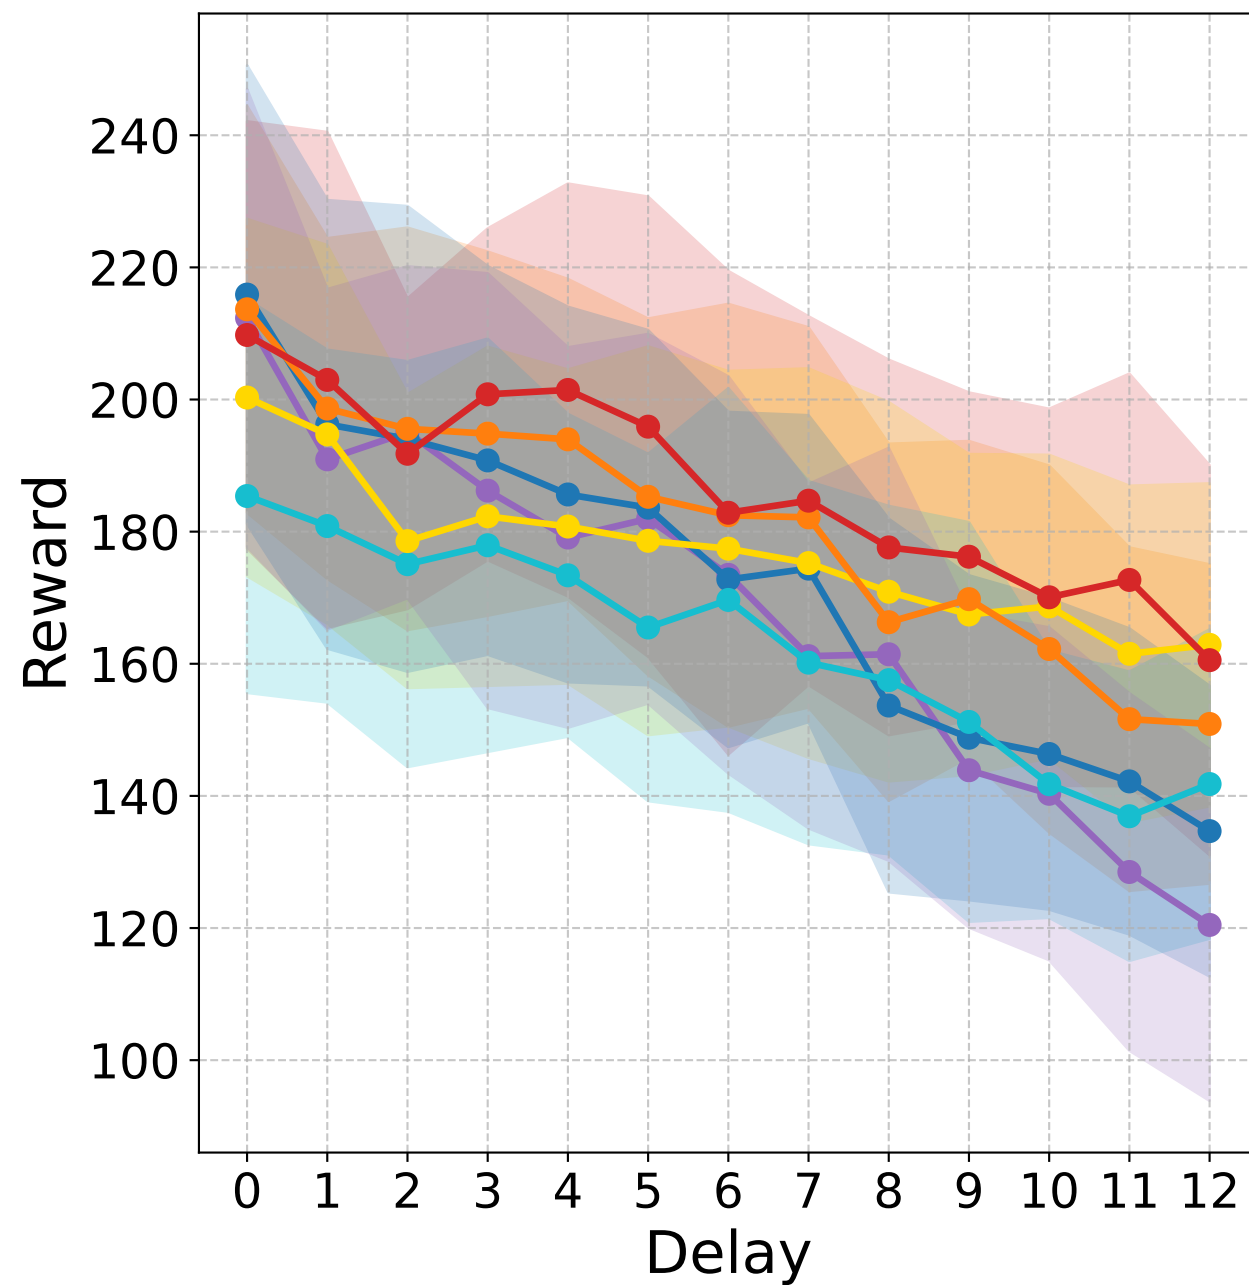

SPREAD

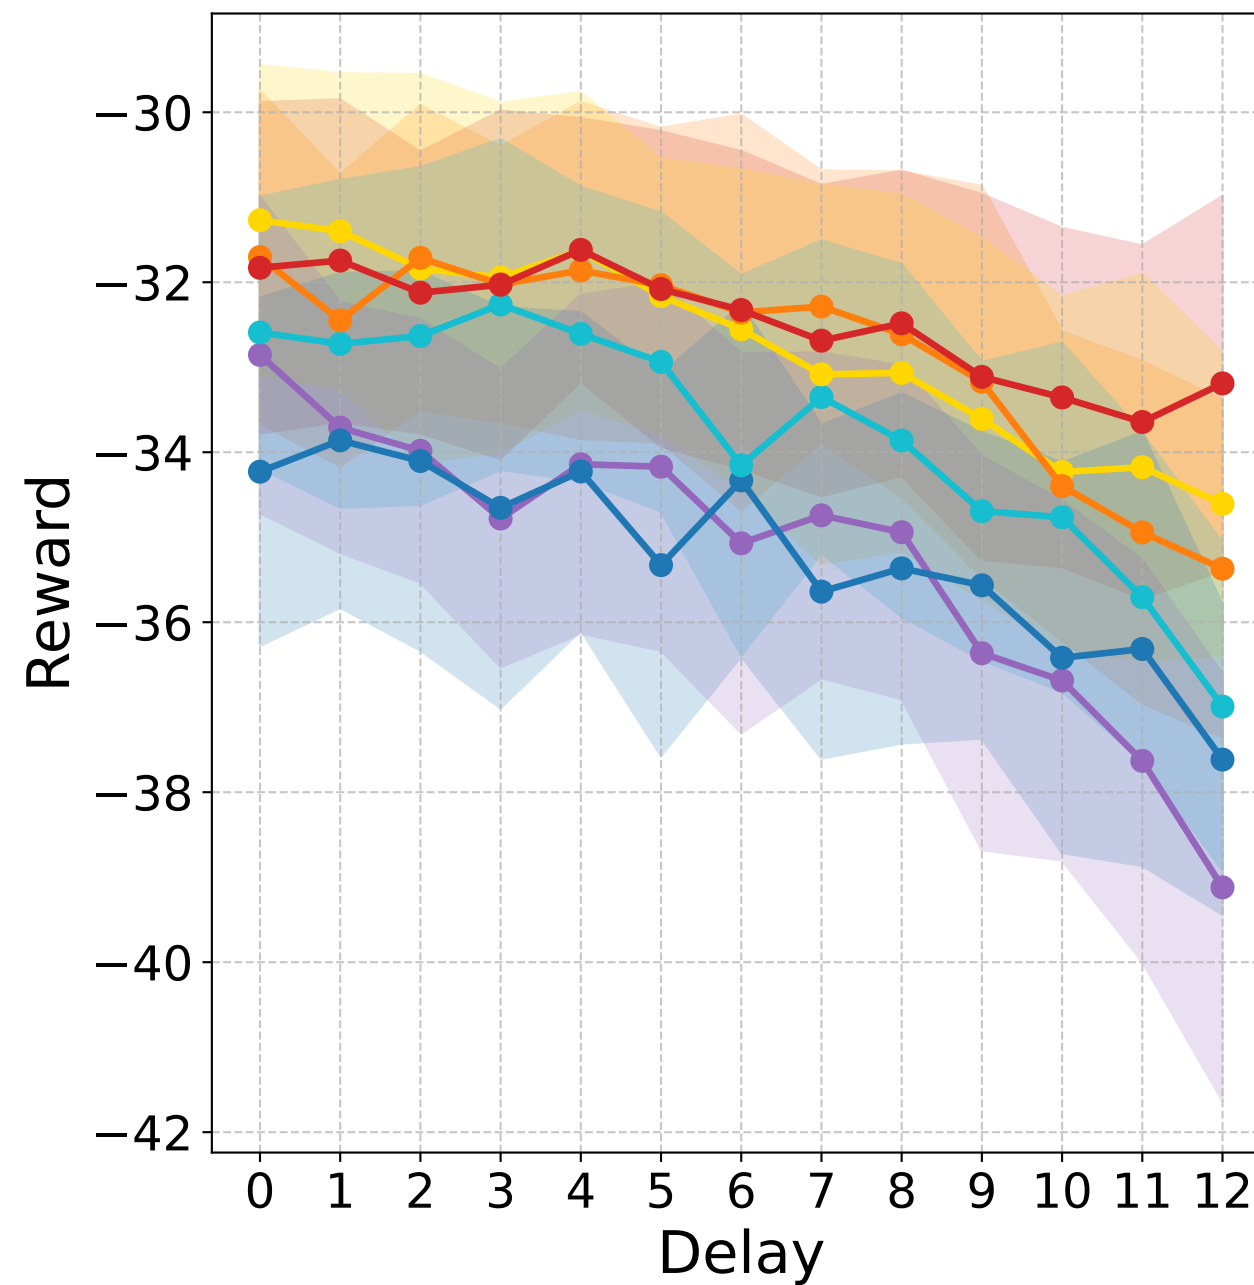

REFERENCE

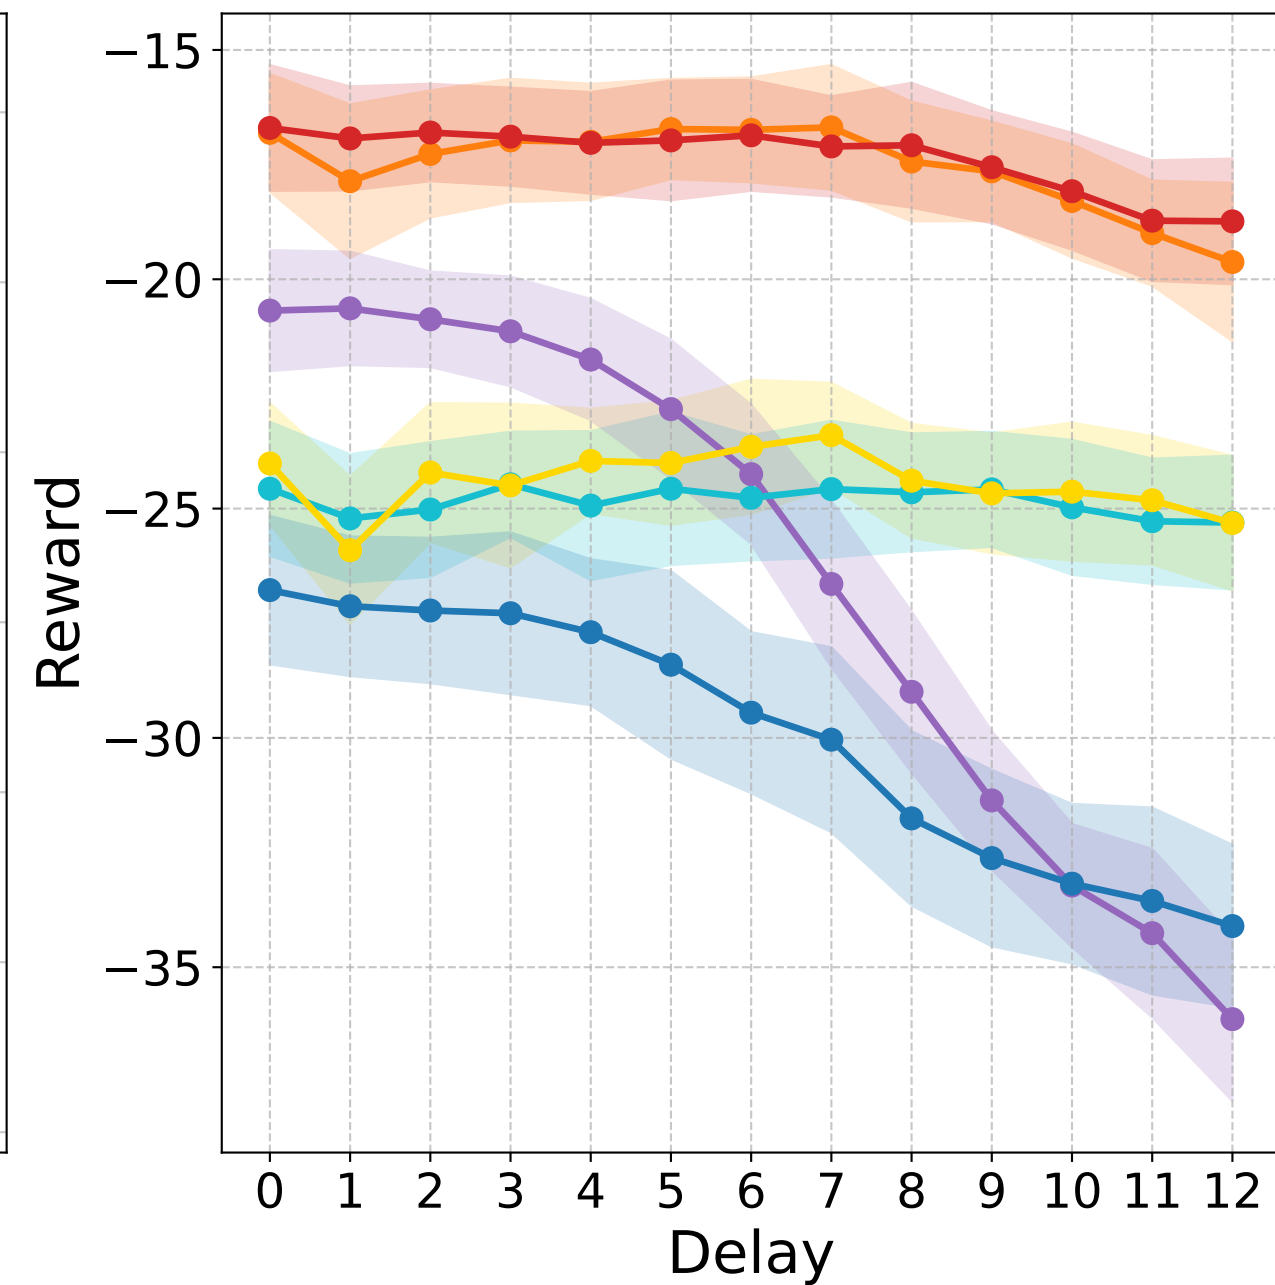

● QMIX(TF Echo)   
 ● QMIX(TF Flash)   
 ● VDN(TF Echo)   
 ● VDN(TF Flash)   
 ● QMIX(GRU Echo)   
 ● QMIX(GRU Flash)
