# Supplementary material
Source: ML conference proceedings conference paper supplement (https://openreview.net/forum?id=KsmlBRhLgs)
Supplement: supplementary_material [file FigD2.pdf › figures/FigD2.pdf]

TAG

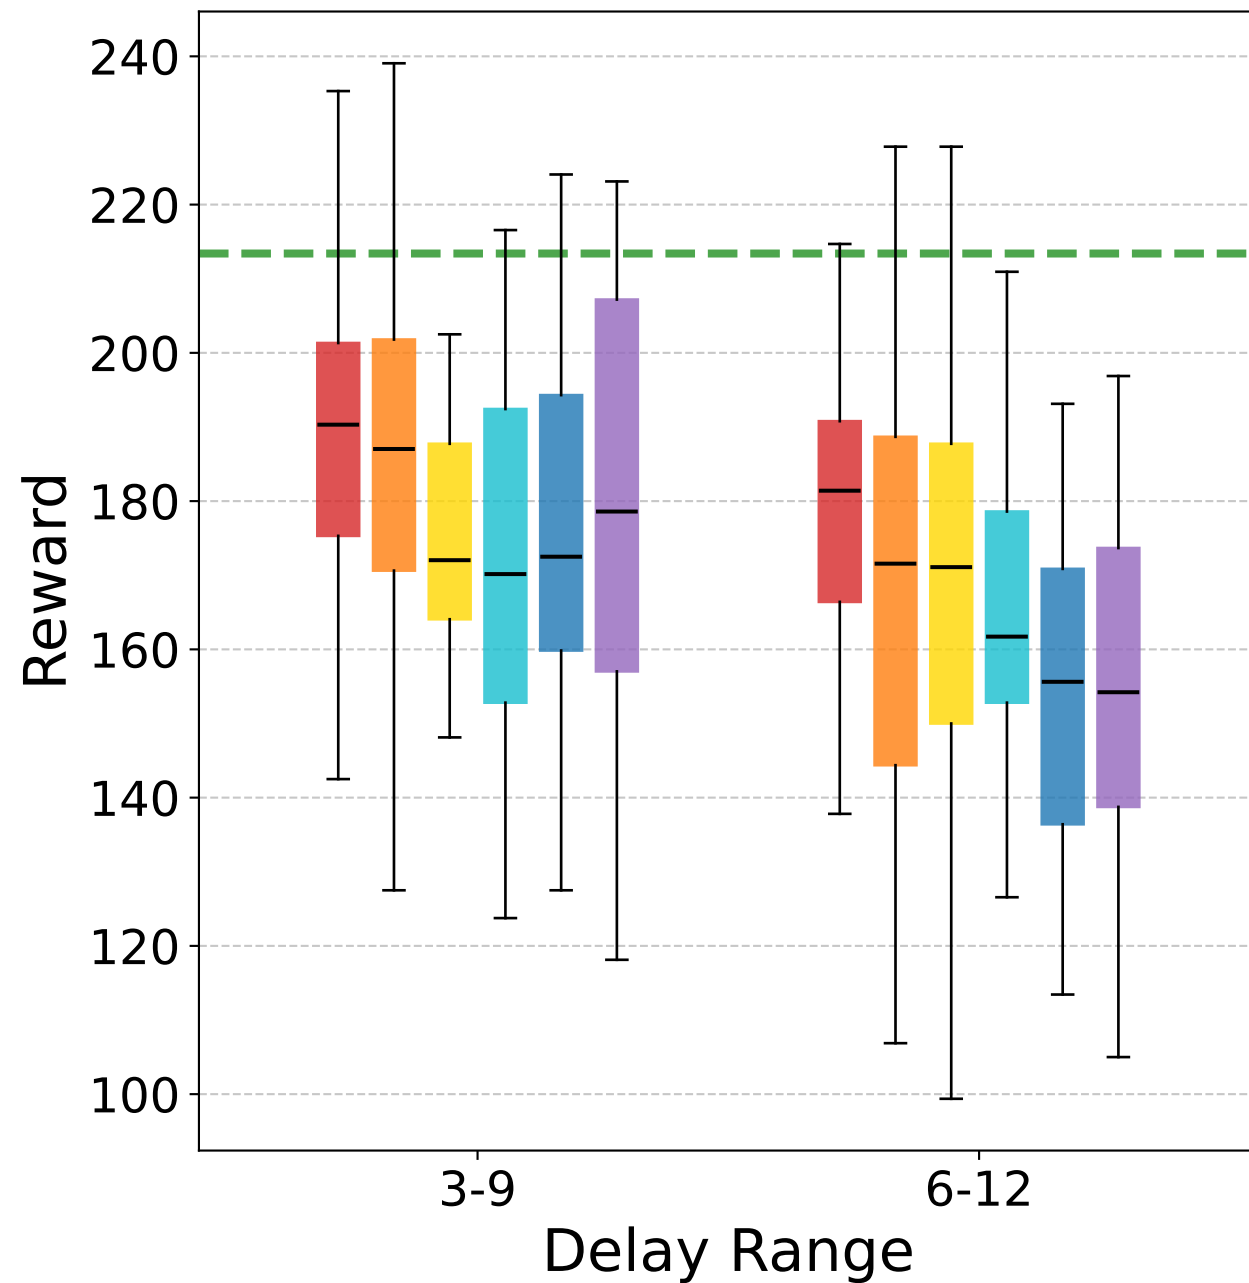

SPREAD

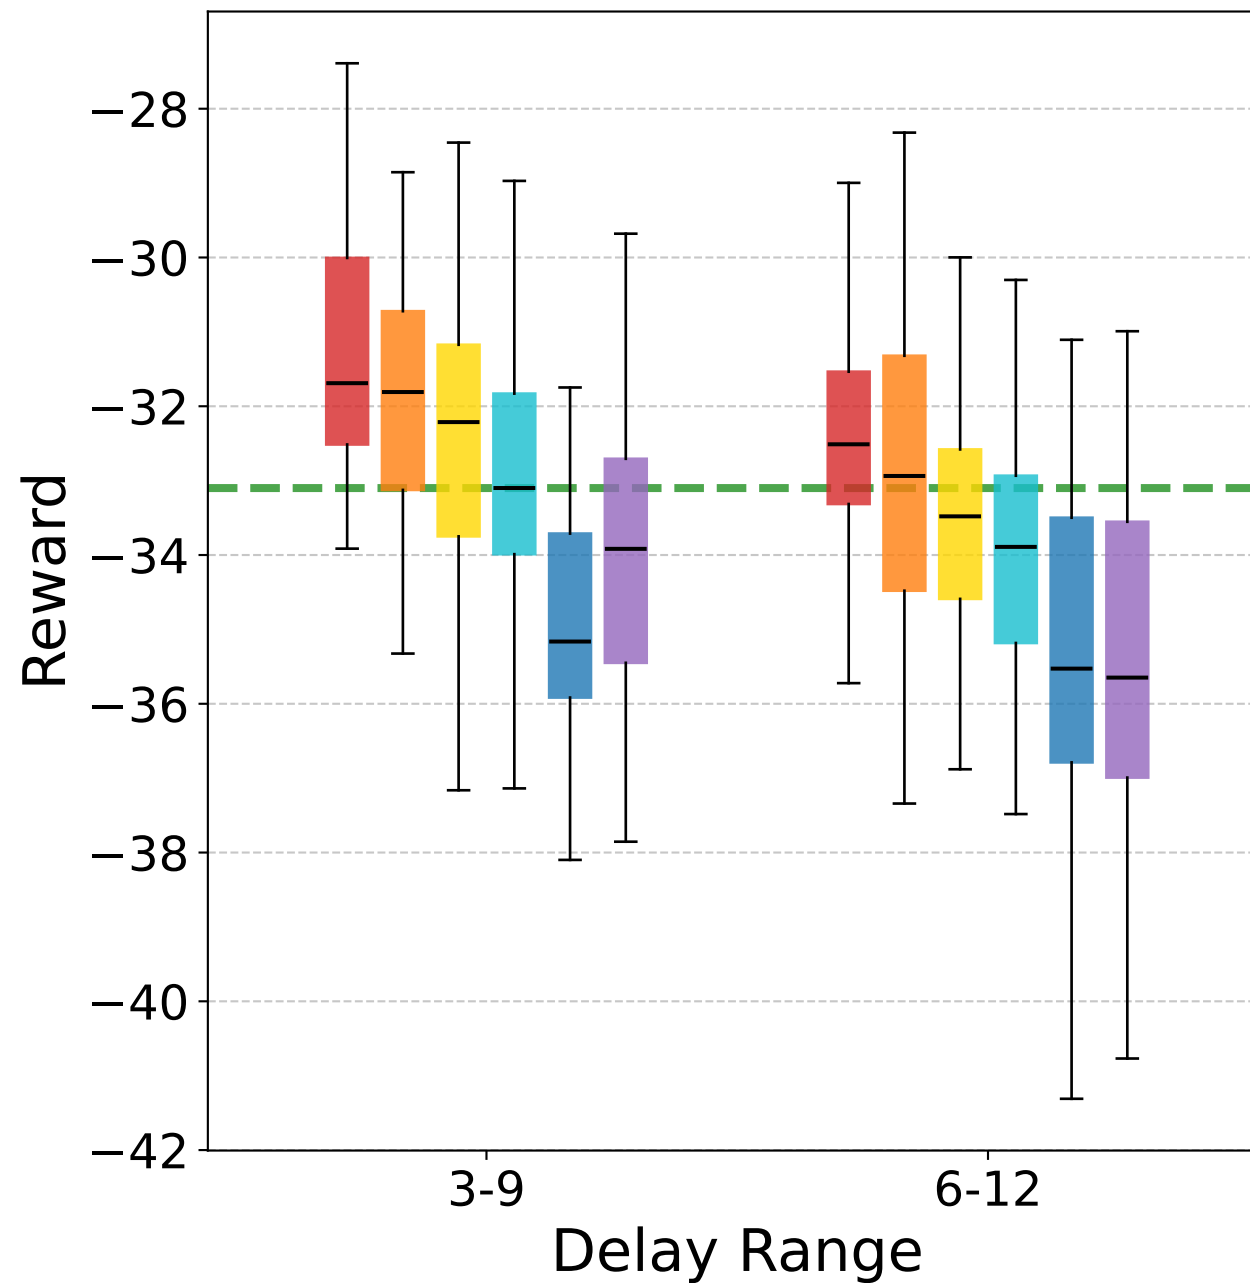

REFERENCE

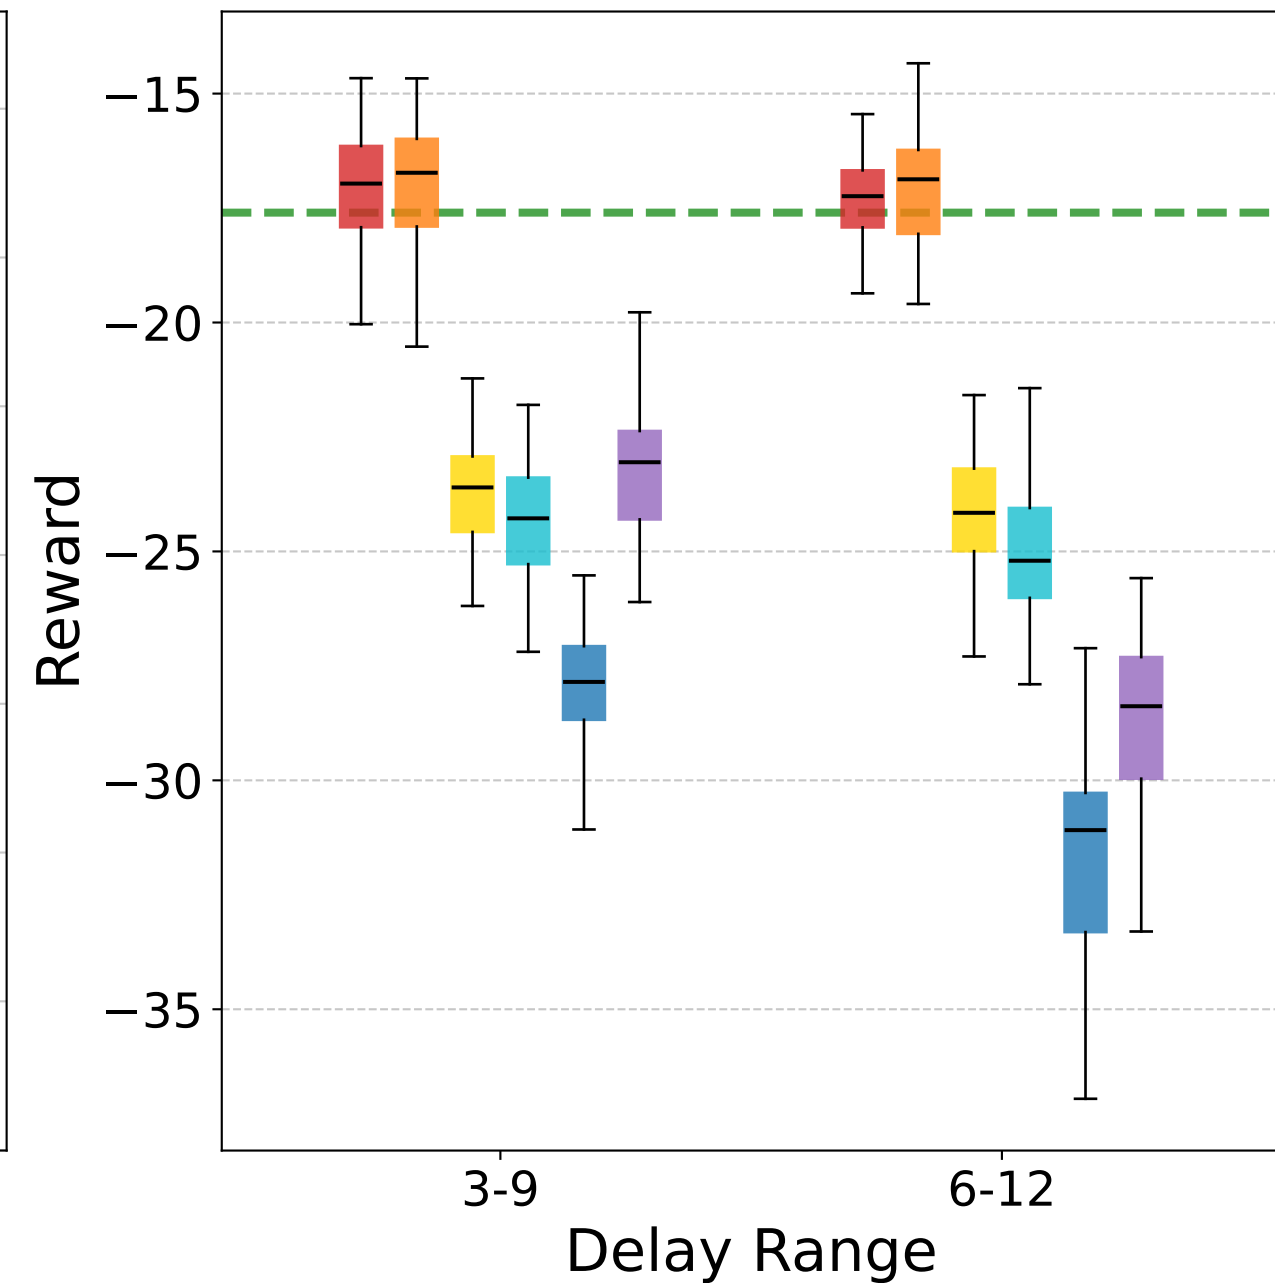

■ QMIX(TF Echo)   
 ■ QMIX(TF Flash)   
 ■ VDN(TF Echo)   
 ■ VDN(TF Flash)   
 ■ QMIX(GRU Echo)   
 ■ QMIX(GRU Flash)
