# Supplementary material
Source: ML conference proceedings conference paper supplement (https://openreview.net/forum?id=KsmlBRhLgs)

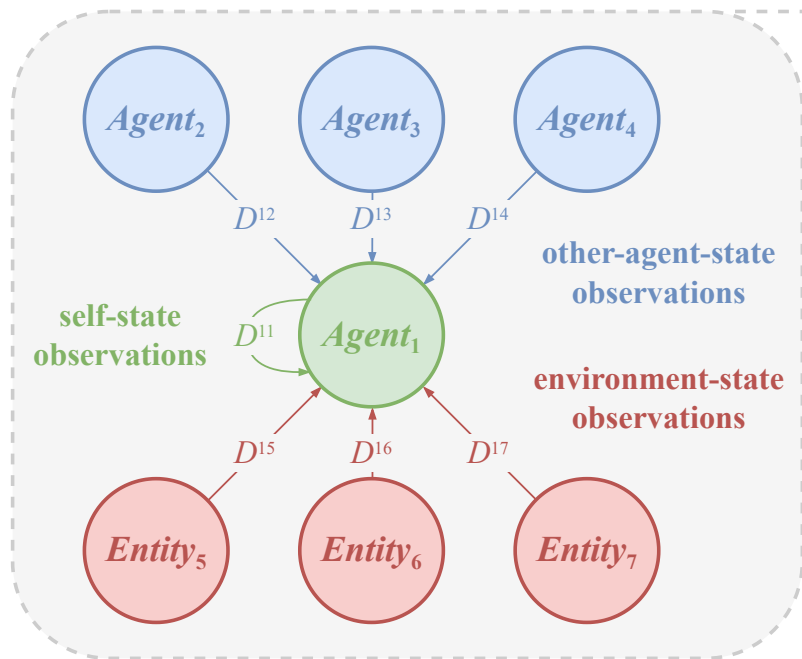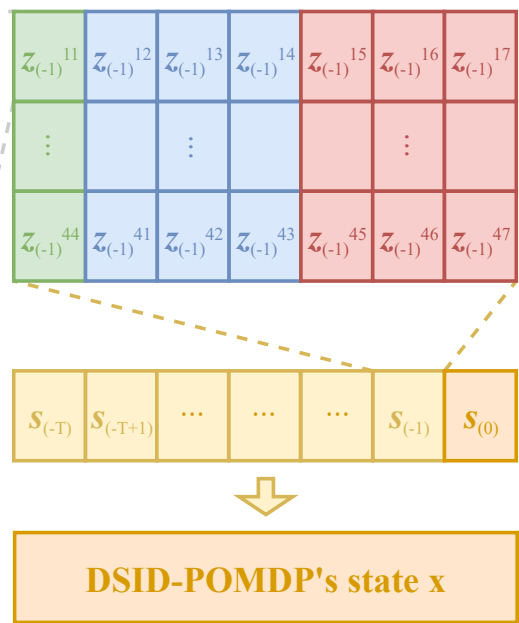

Supplement: supplementary_material [file Fig1.pdf › figures/Fig1.pdf]

TAG

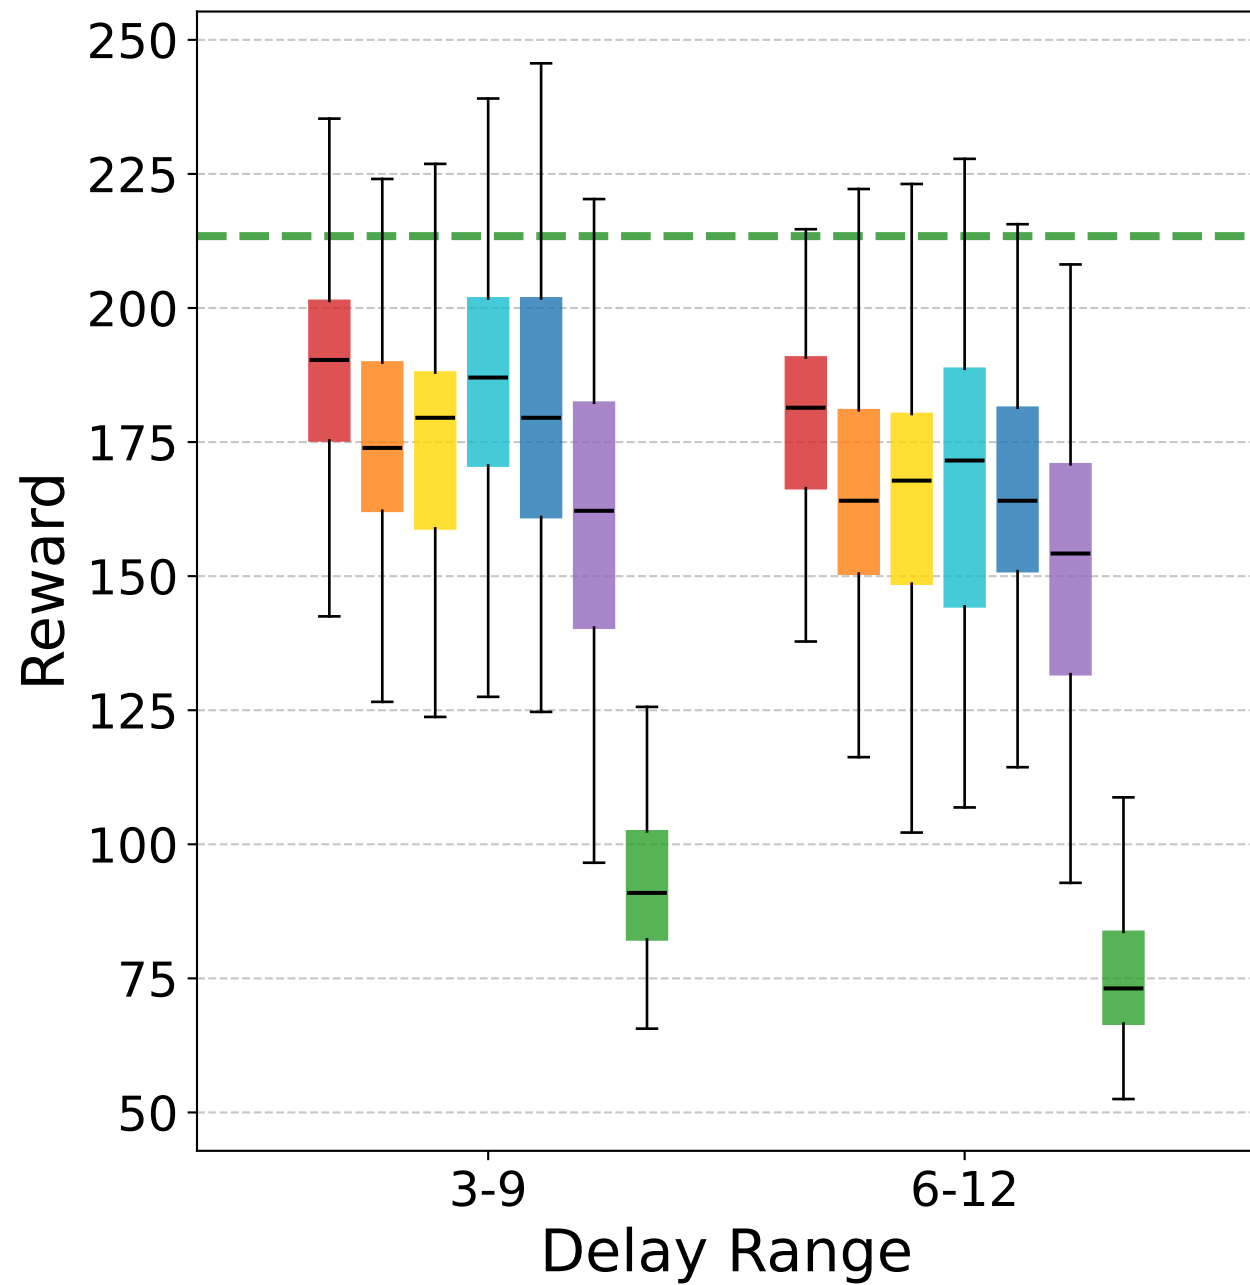

SPREAD

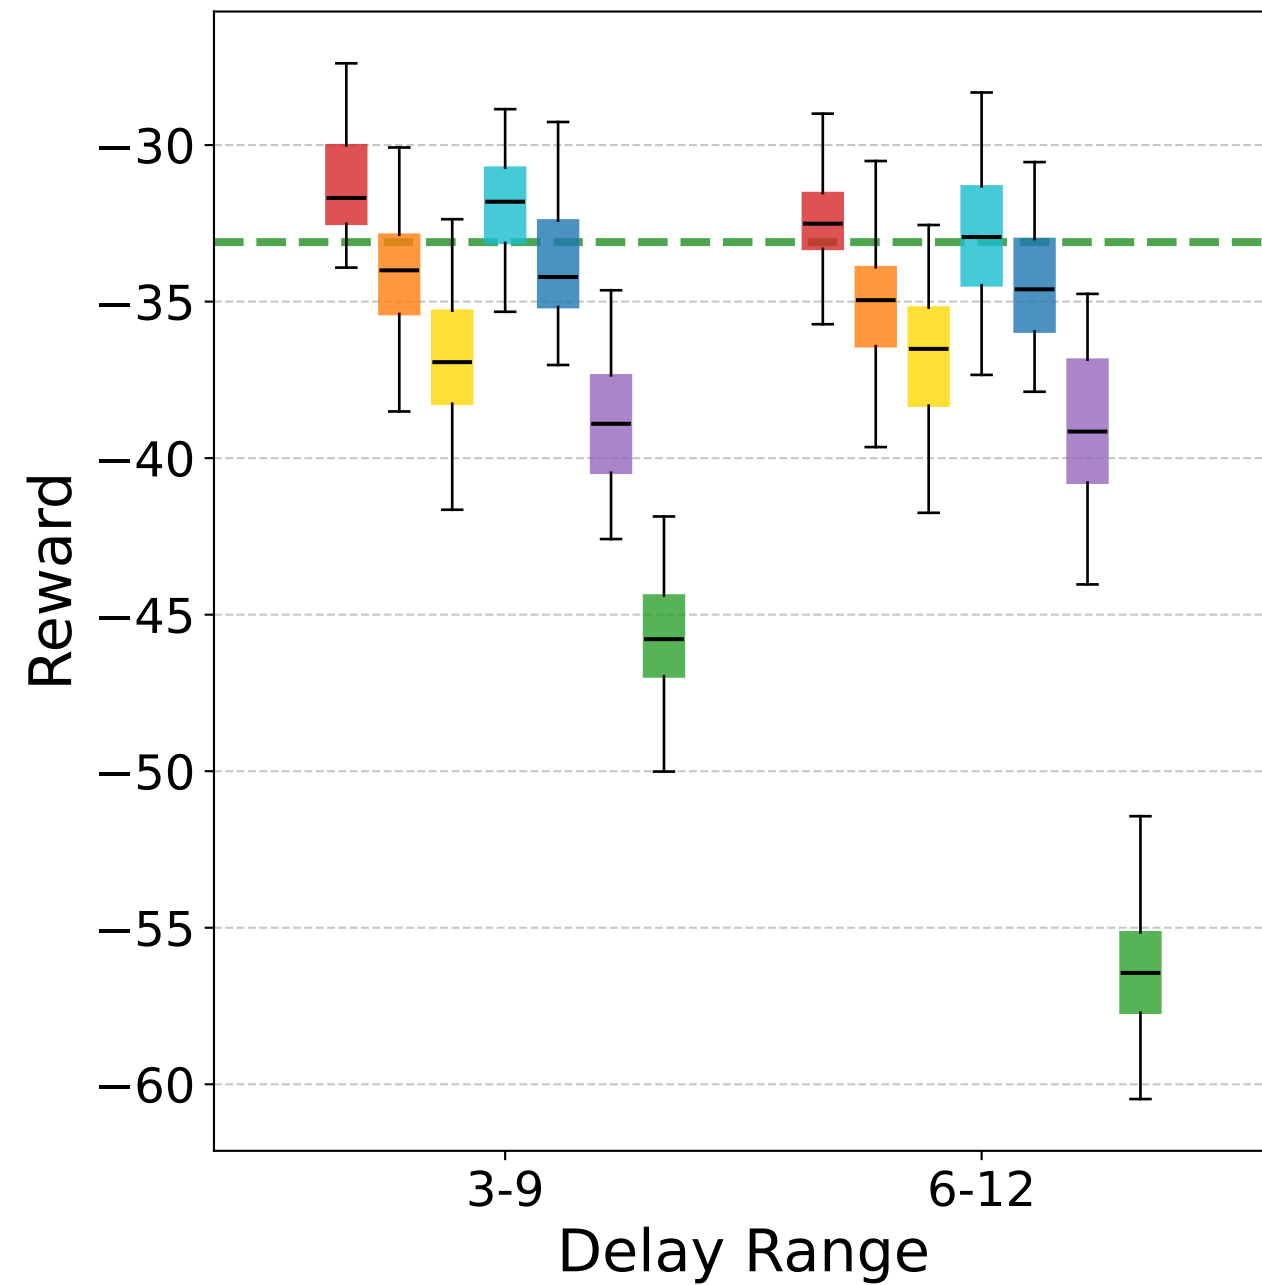

REFERENCE

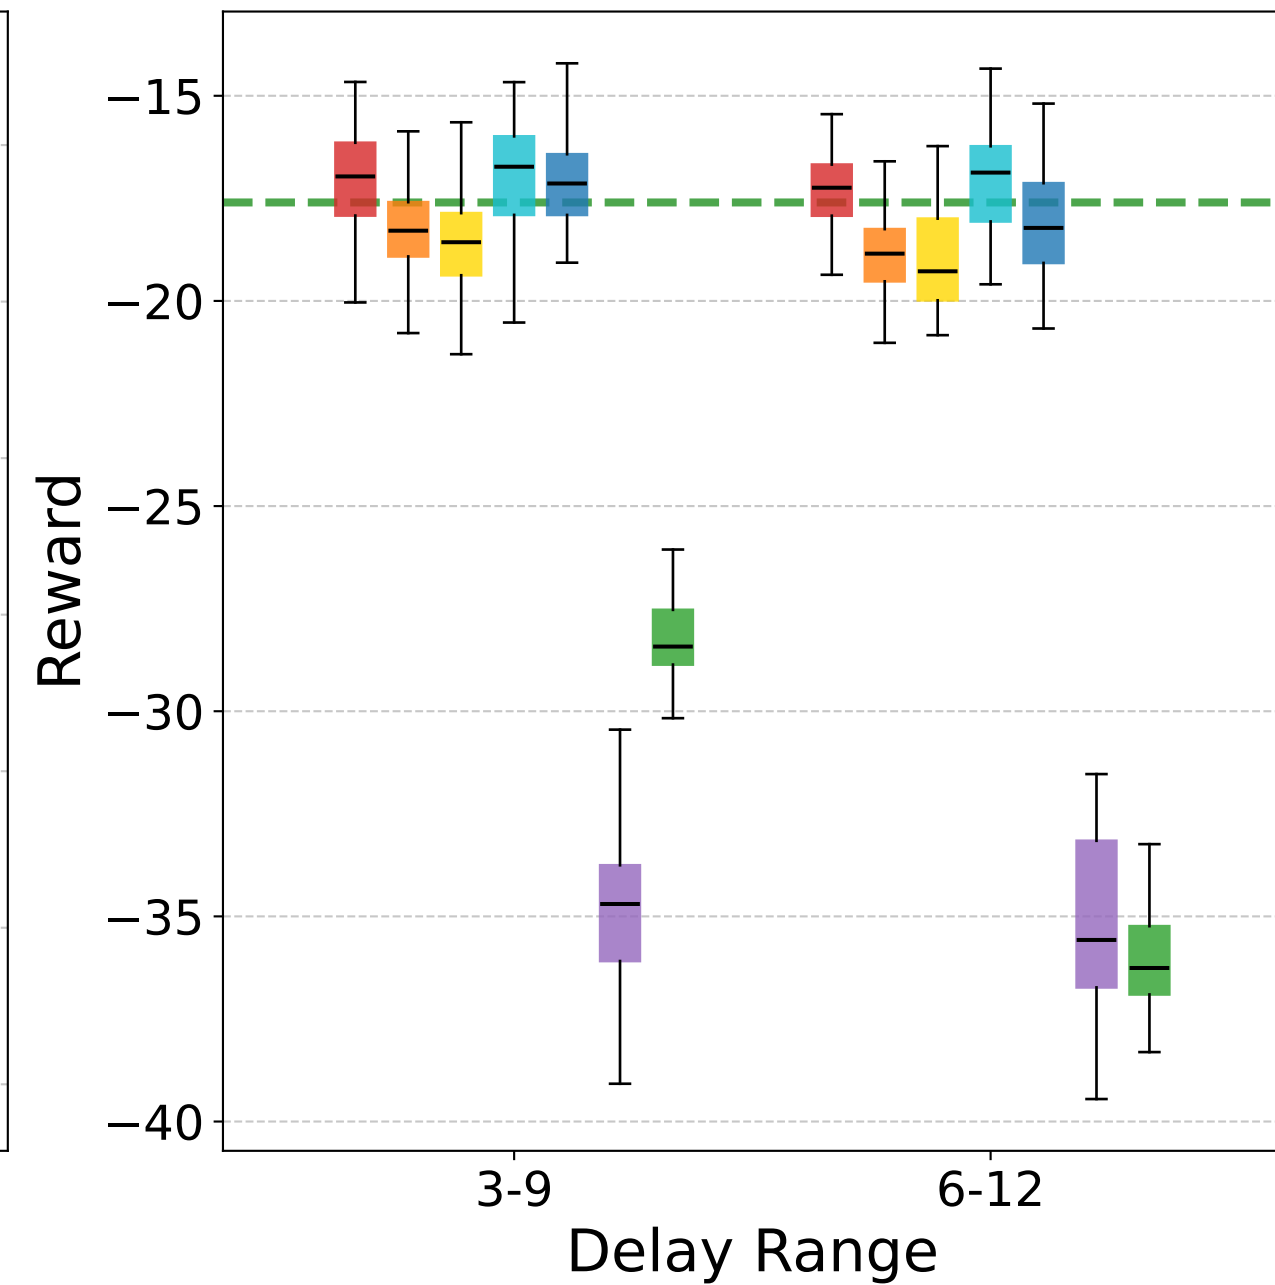

Echo+H+DR+KD Echo+H+DR Echo+DR Flash+H+DR+KD Flash+H+DR Flash+DR Oracle

Supplement: supplementary_material [file Fig10.pdf › figures/Fig10.pdf]

TAG

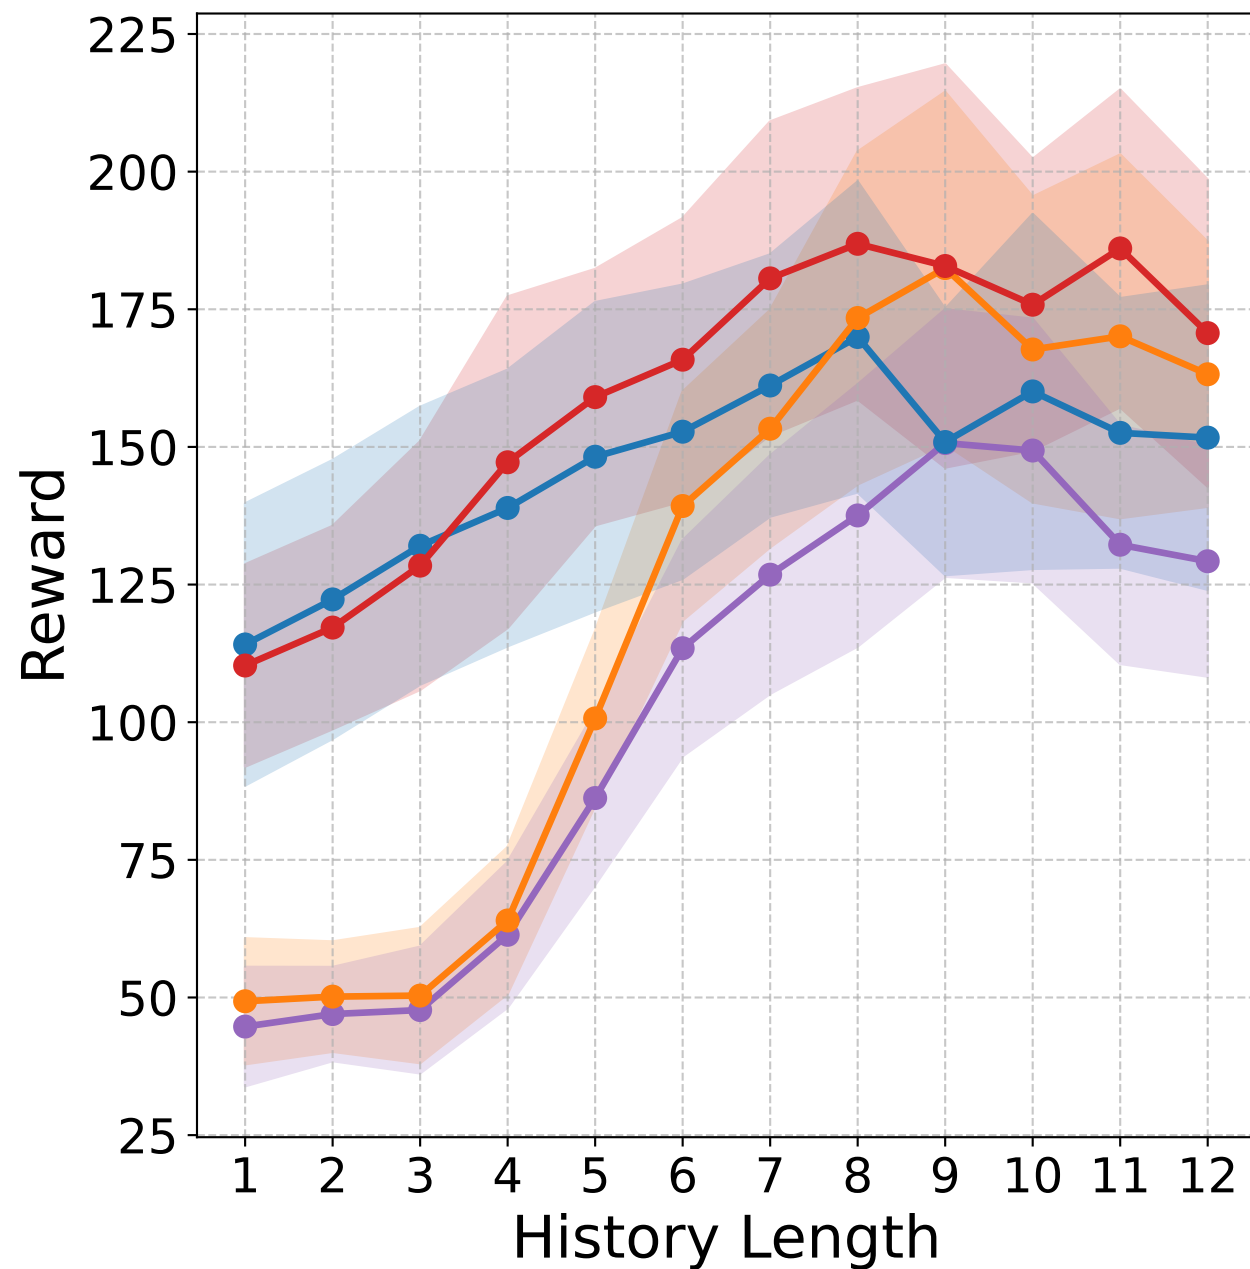

SPREAD

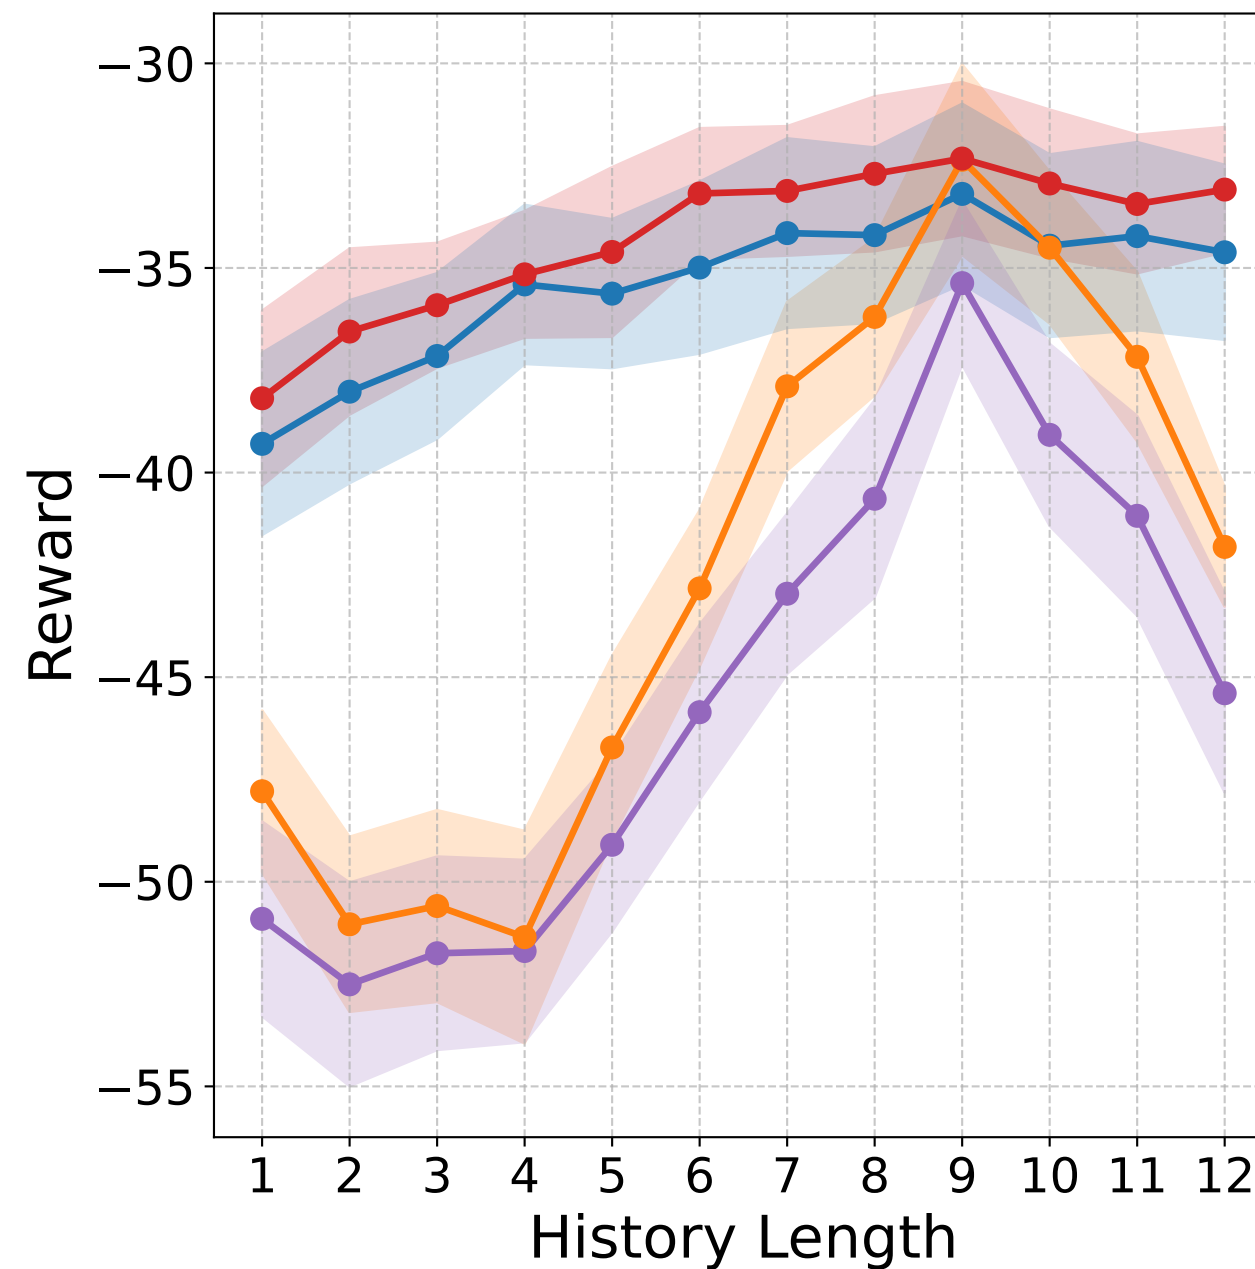

REFERENCE

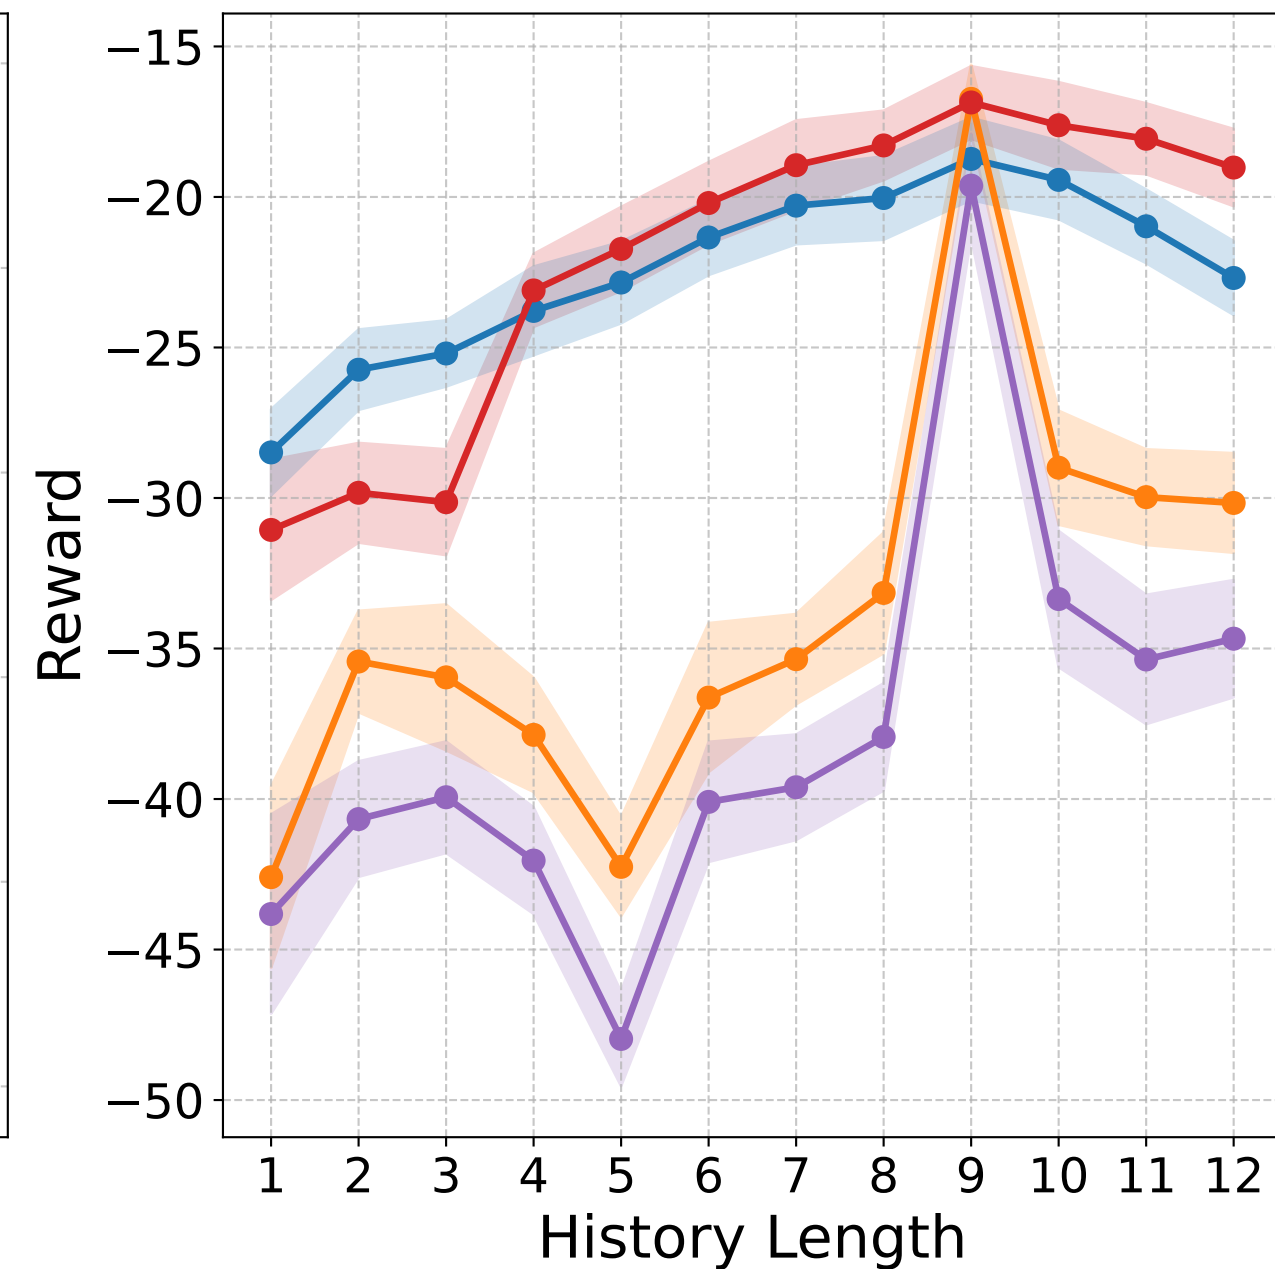

—●— Echo(fixed delay 6)    —●— Flash(fixed delay 6)    —●— Echo(fixed delay 12)    —●— Flash(fixed delay 12)

Supplement: supplementary_material [file Fig11.pdf › figures/Fig11.pdf]

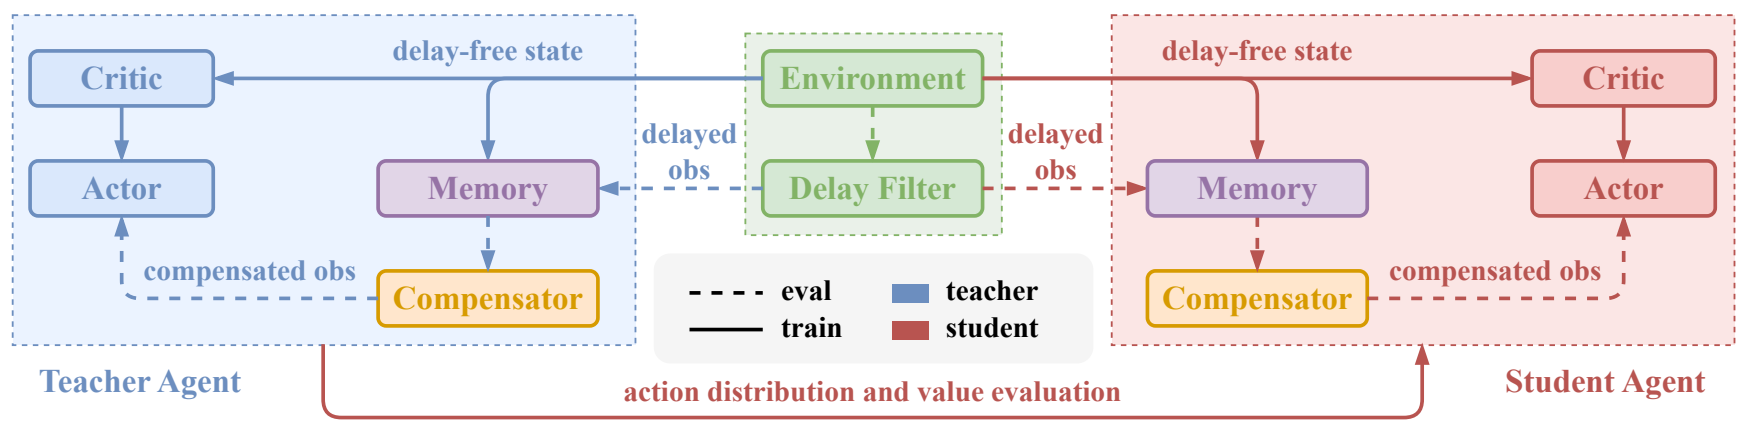

Supplement: supplementary_material [file Fig2.pdf › figures/Fig2.pdf]

## GRU

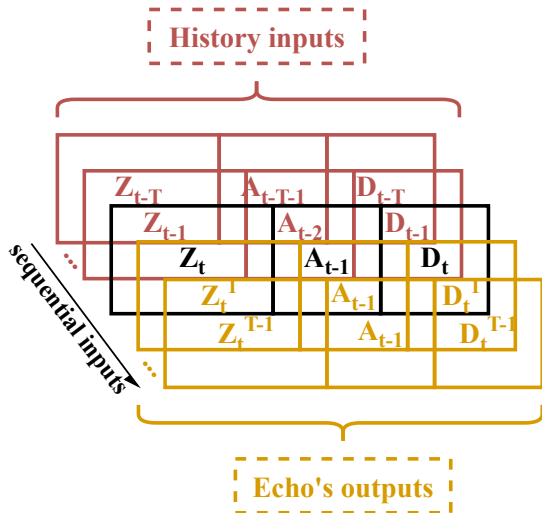

## Transformer

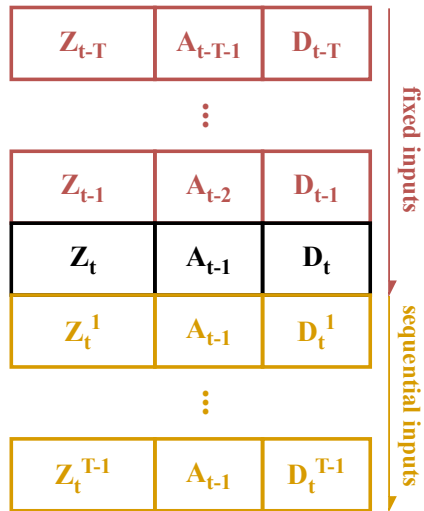

Supplement: supplementary_material [file Fig4.pdf › figures/Fig4.pdf]

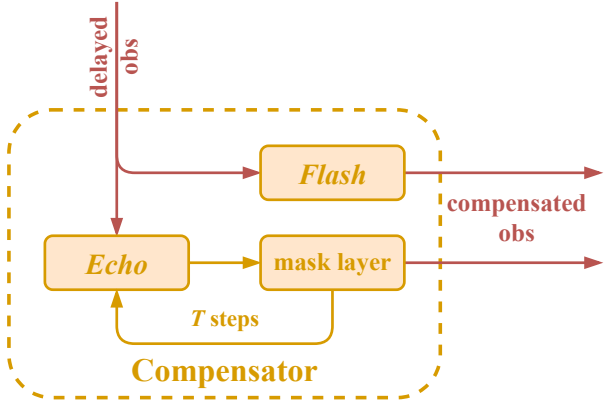

Supplement: supplementary_material [file Fig5.pdf › figures/Fig5.pdf]

TAG

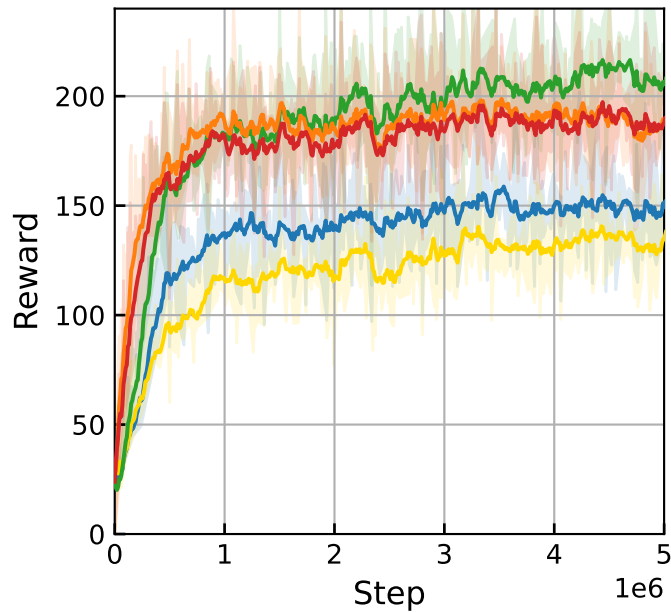

SPREAD

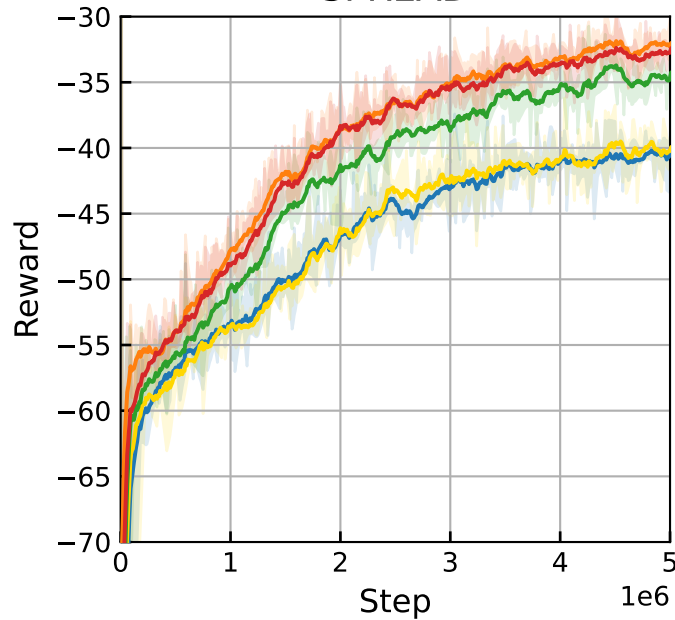

REFERENCE

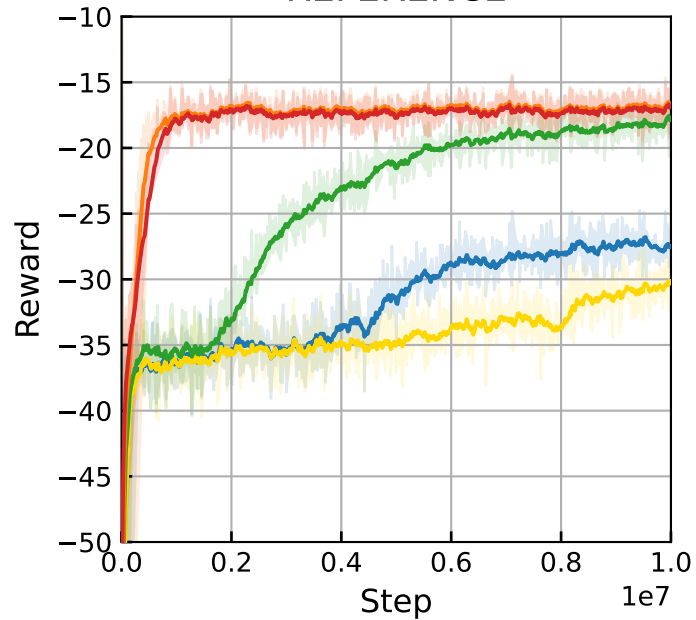

— Ours(Echo) — Ours(Flash) — Base — Base+DR — Oracle

Supplement: supplementary_material [file Fig6.pdf › figures/Fig6.pdf]

3s\_vs\_5z

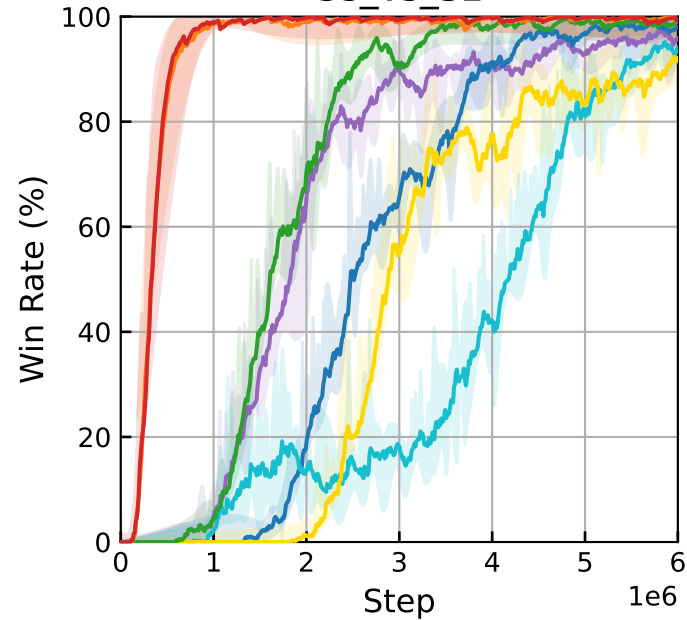

5m\_vs\_6m

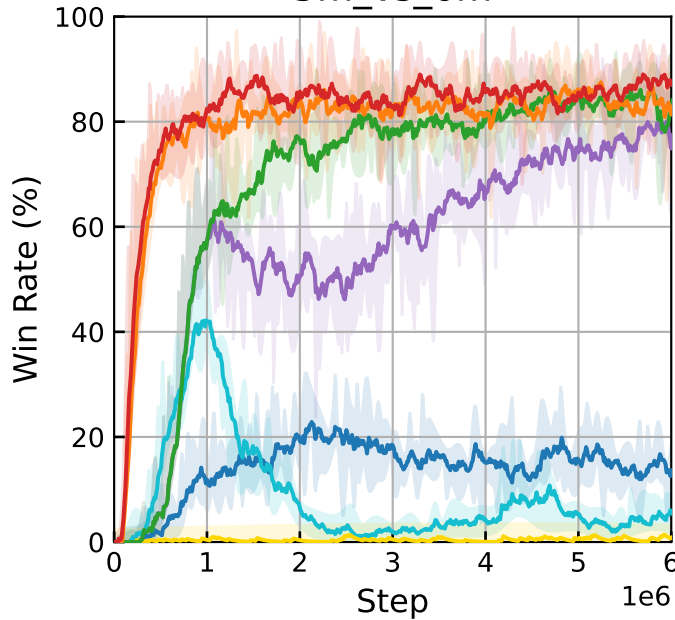

6h\_vs\_8z

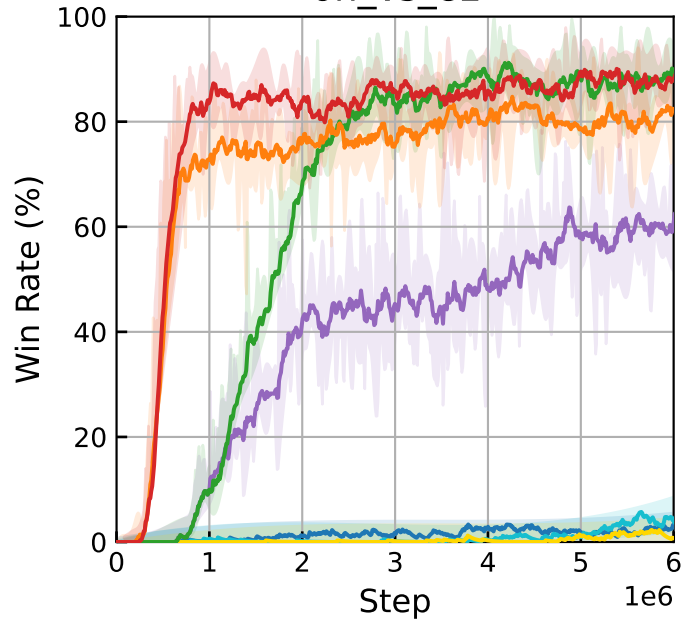

— Ours(Echo) — Ours(Flash) — Base — Base+C — Base+DR — Base+C+DR — Oracle

Supplement: supplementary_material [file Fig7.pdf › figures/Fig7.pdf]

TAG

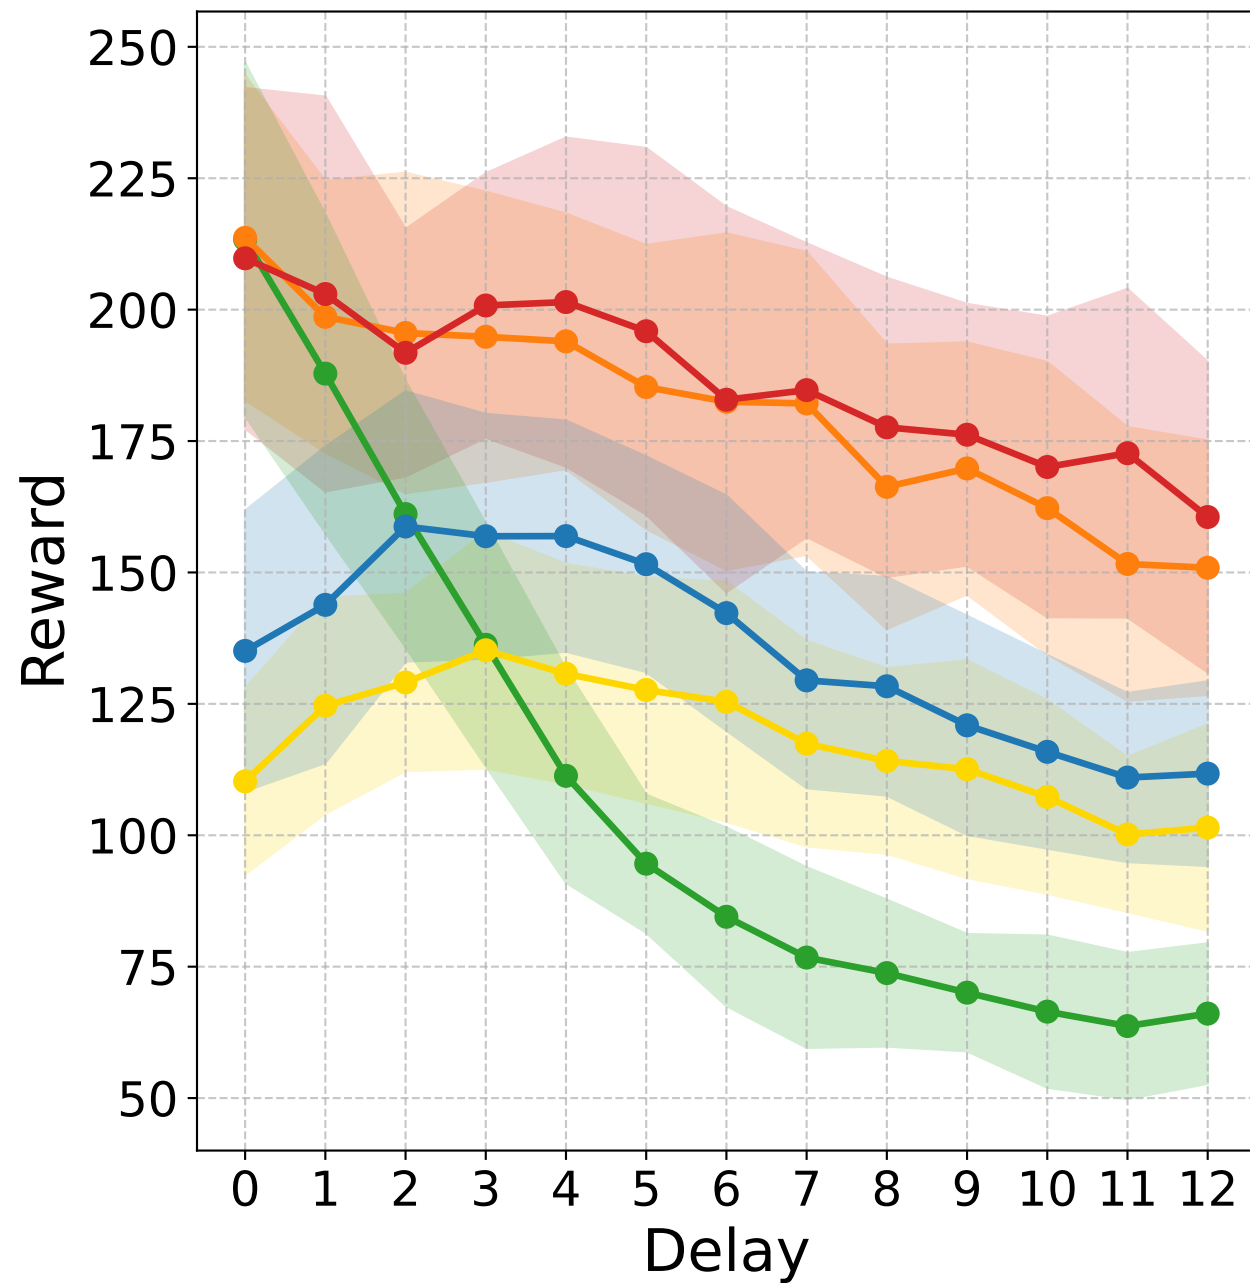

SPREAD

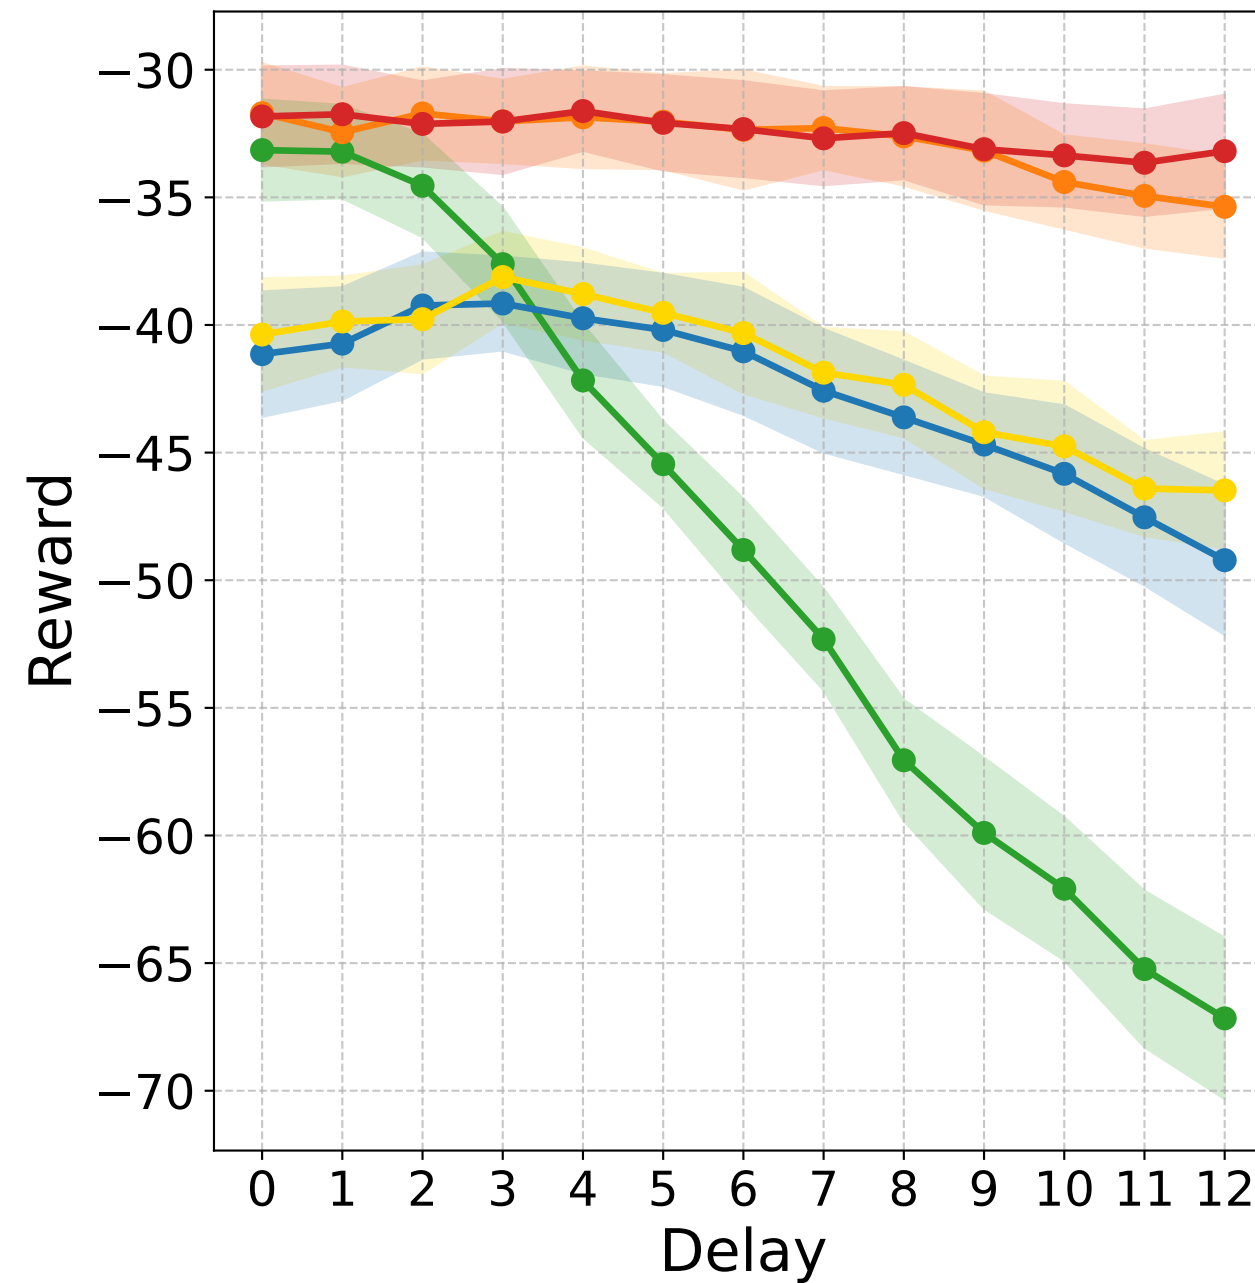

REFERENCE

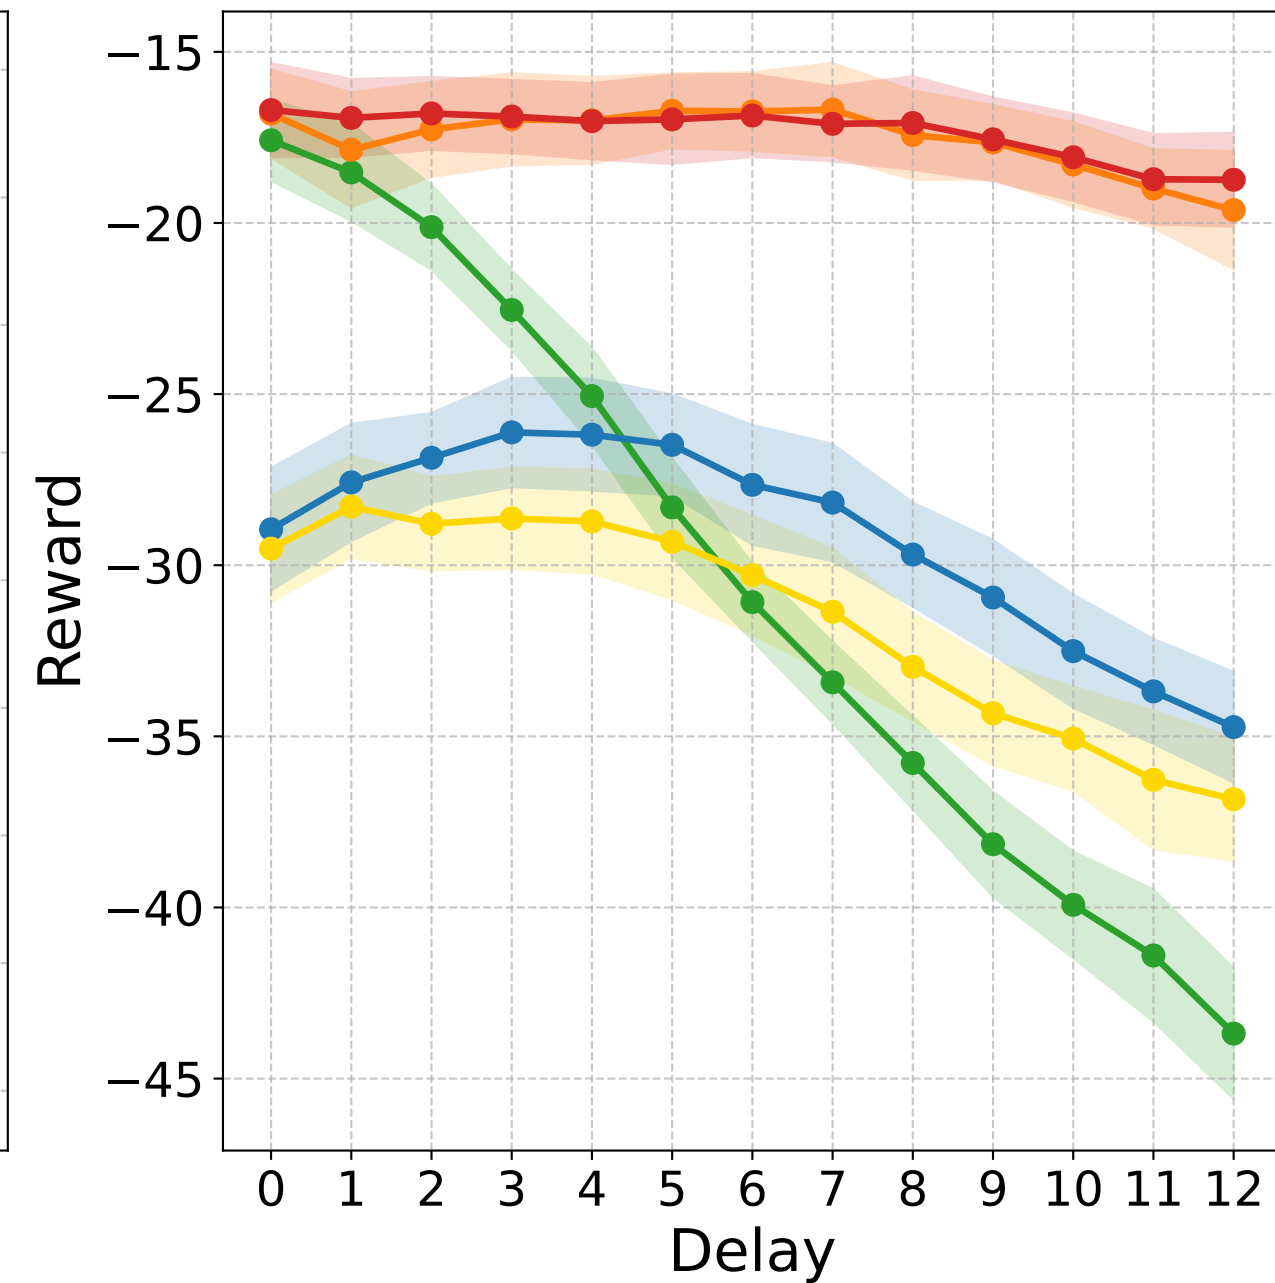

—●— Ours(Echo)    —●— Ours(Flash)    —●— Base    —●— Base+DR    —●— Oracle

Supplement: supplementary_material [file Fig8.pdf › figures/Fig8.pdf]

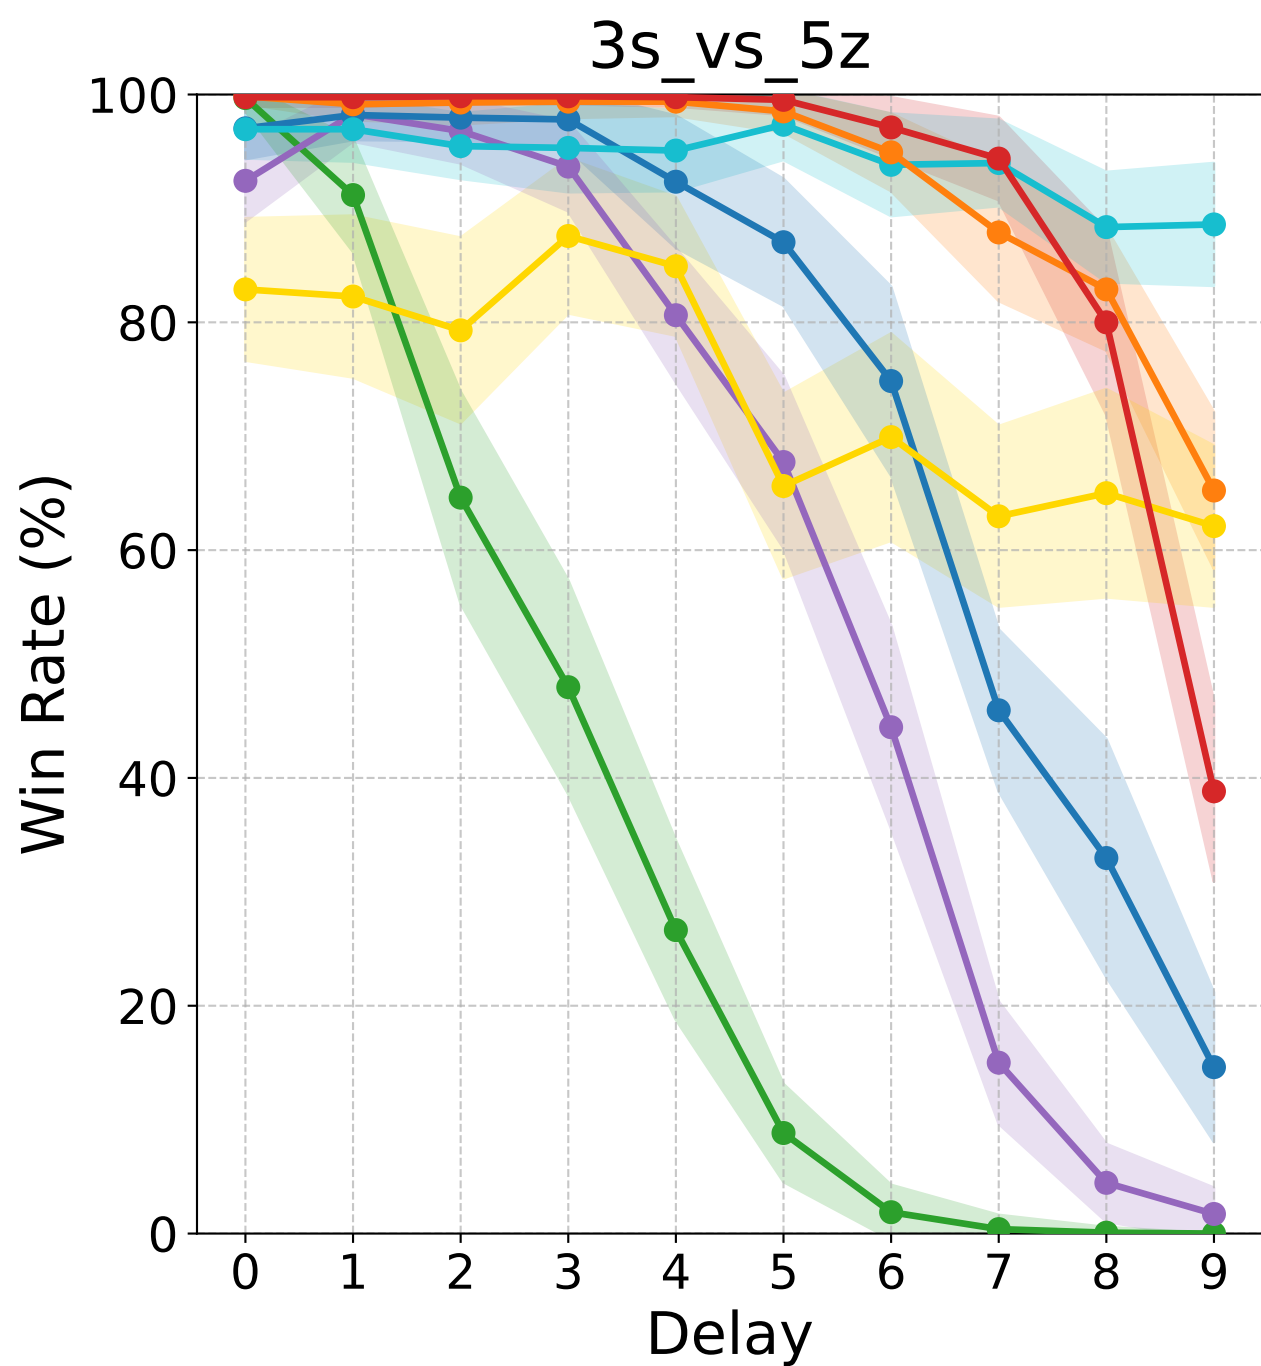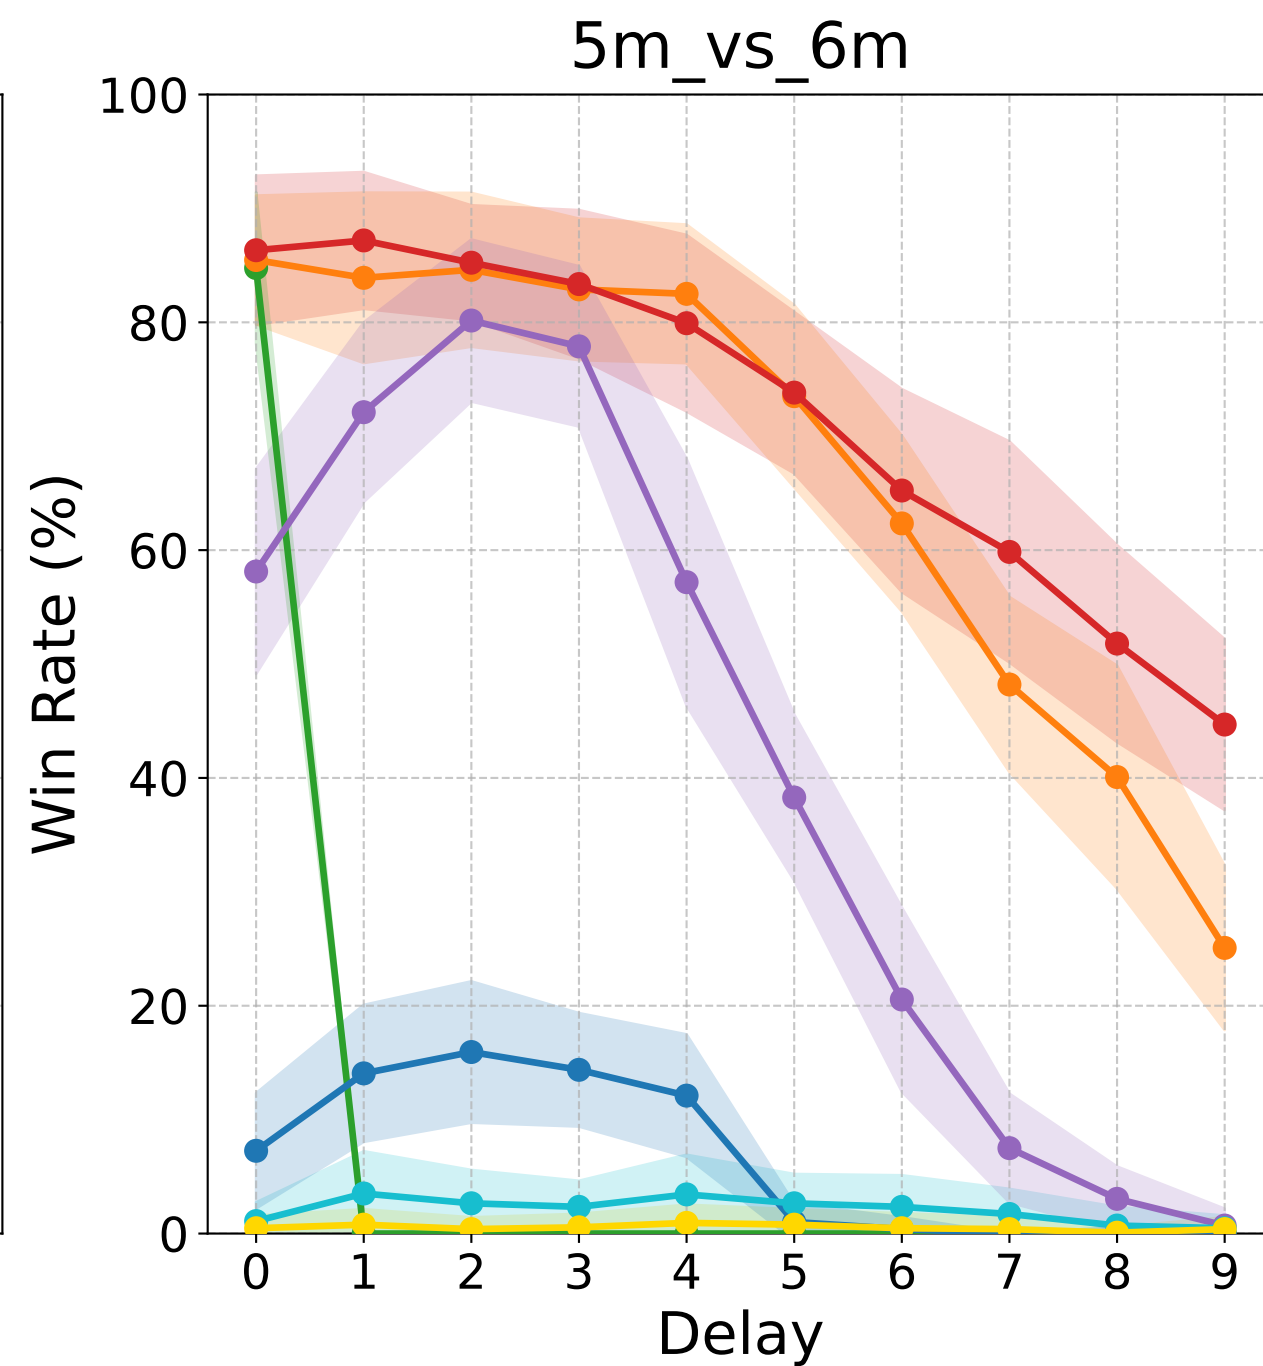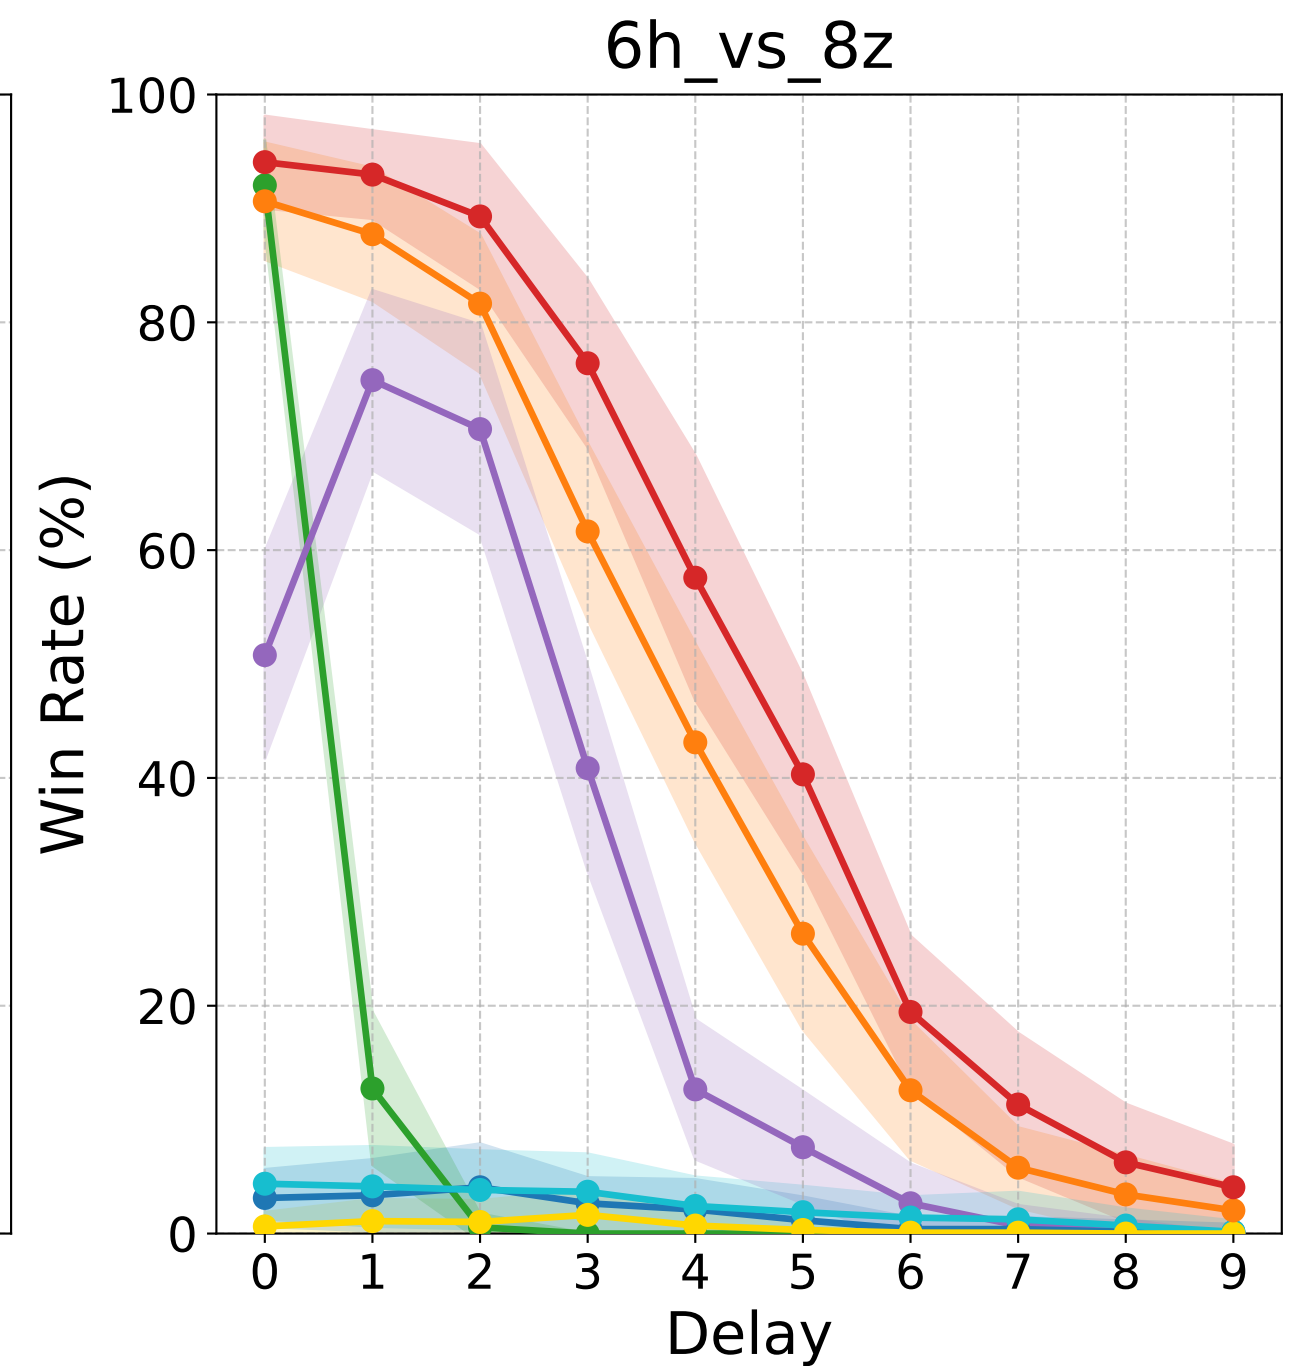

—●— Ours(Echo)    —●— Ours(Flash)    —●— Base    —●— Base+C    —●— Base+DR    —●— Base+DR+C    —●— Oracle

Supplement: supplementary_material [file Fig9.pdf › figures/Fig9.pdf]

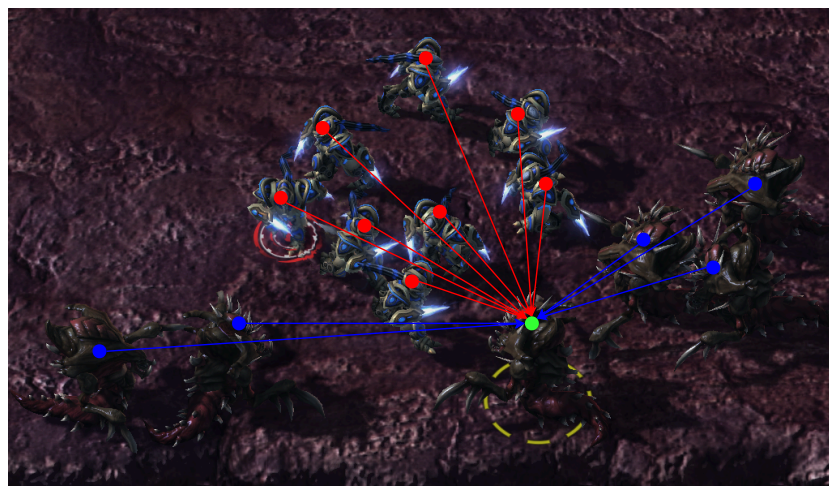

(a)

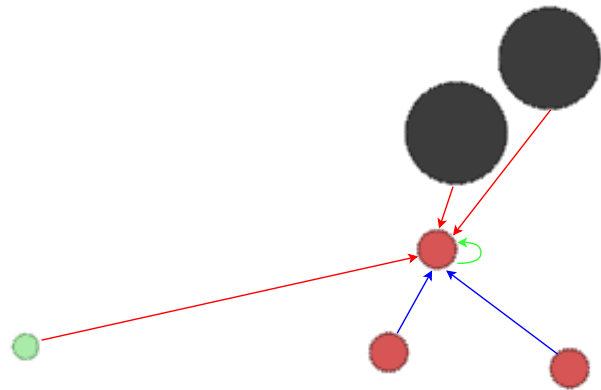

(b)

Supplement: supplementary_material [file FigC1.pdf › figures/FigC1.pdf]

|       |       |               |
|-------|-------|---------------|
| $Z_3$ | $A_2$ | 3 2 0 1 1 2 3 |
|-------|-------|---------------|

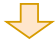

|         |  |               |
|---------|--|---------------|
| $Z_3^3$ |  | 3 3 3 3 3 3 3 |
|---------|--|---------------|

(a)

|       |            |               |
|-------|------------|---------------|
| $Z_0$ | $A_{init}$ | 0 0 0 0 0 0 0 |
| $Z_1$ | $A_0$      | 1 1 0 0 0 1 1 |
| $Z_2$ | $A_1$      | 2 1 0 1 0 1 2 |
| $Z_3$ | $A_2$      | 3 2 0 1 1 2 3 |

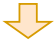

|         |  |               |
|---------|--|---------------|
| $Z_3^3$ |  | 3 3 3 3 3 3 3 |
|---------|--|---------------|

(b)

|         |       |               |
|---------|-------|---------------|
| $Z_3$   | $A_2$ | 3 2 0 1 1 2 3 |
| $Z_3^1$ | $A_2$ | 3 3 1 2 2 3 3 |
| $Z_3^2$ | $A_2$ | 3 3 2 3 3 3 3 |

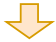

|         |  |               |
|---------|--|---------------|
| $Z_3^3$ |  | 3 3 3 3 3 3 3 |
|---------|--|---------------|

(c)

|         |            |               |
|---------|------------|---------------|
| $Z_0$   | $A_{init}$ | 0 0 0 0 0 0 0 |
| $Z_1$   | $A_0$      | 1 1 0 0 0 1 1 |
| $Z_2$   | $A_1$      | 2 1 0 1 0 1 2 |
| $Z_3$   | $A_2$      | 3 2 0 1 1 2 3 |
| $Z_3^1$ | $A_2$      | 3 3 1 2 2 3 3 |
| $Z_3^2$ | $A_2$      | 3 3 2 3 3 3 3 |

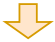

|         |  |               |
|---------|--|---------------|
| $Z_3^3$ |  | 3 3 3 3 3 3 3 |
|---------|--|---------------|

(d)

Supplement: supplementary_material [file FigC2.pdf › figures/FigC2.pdf]

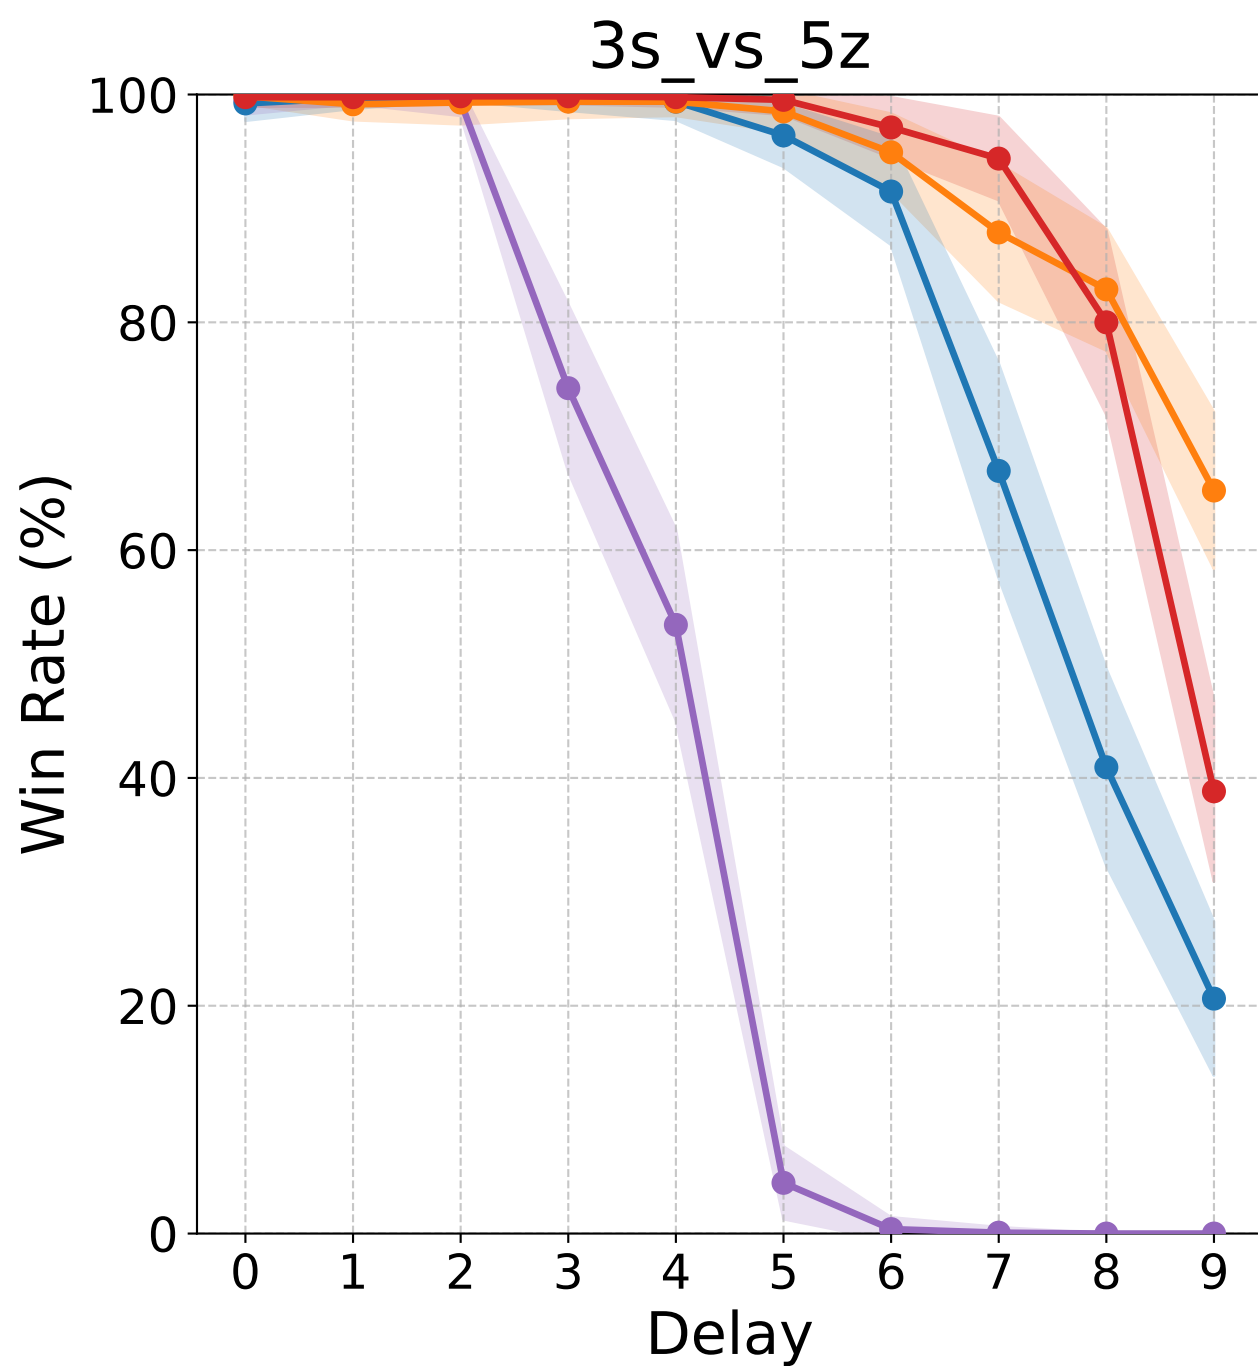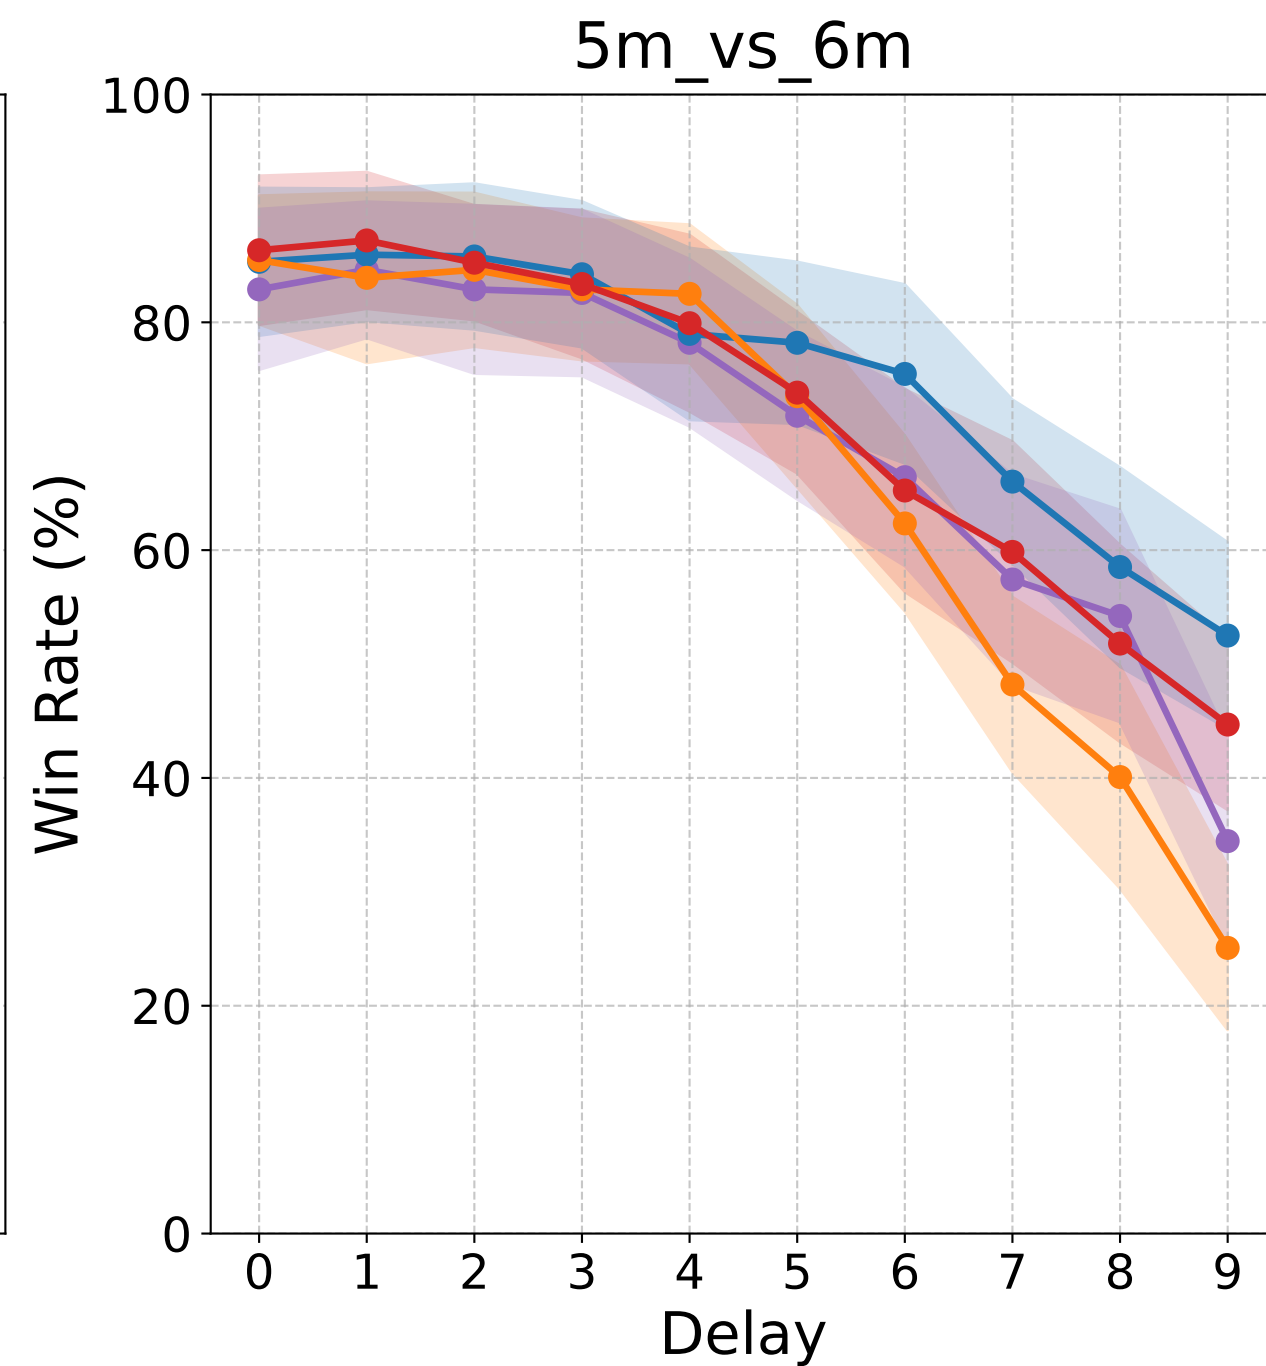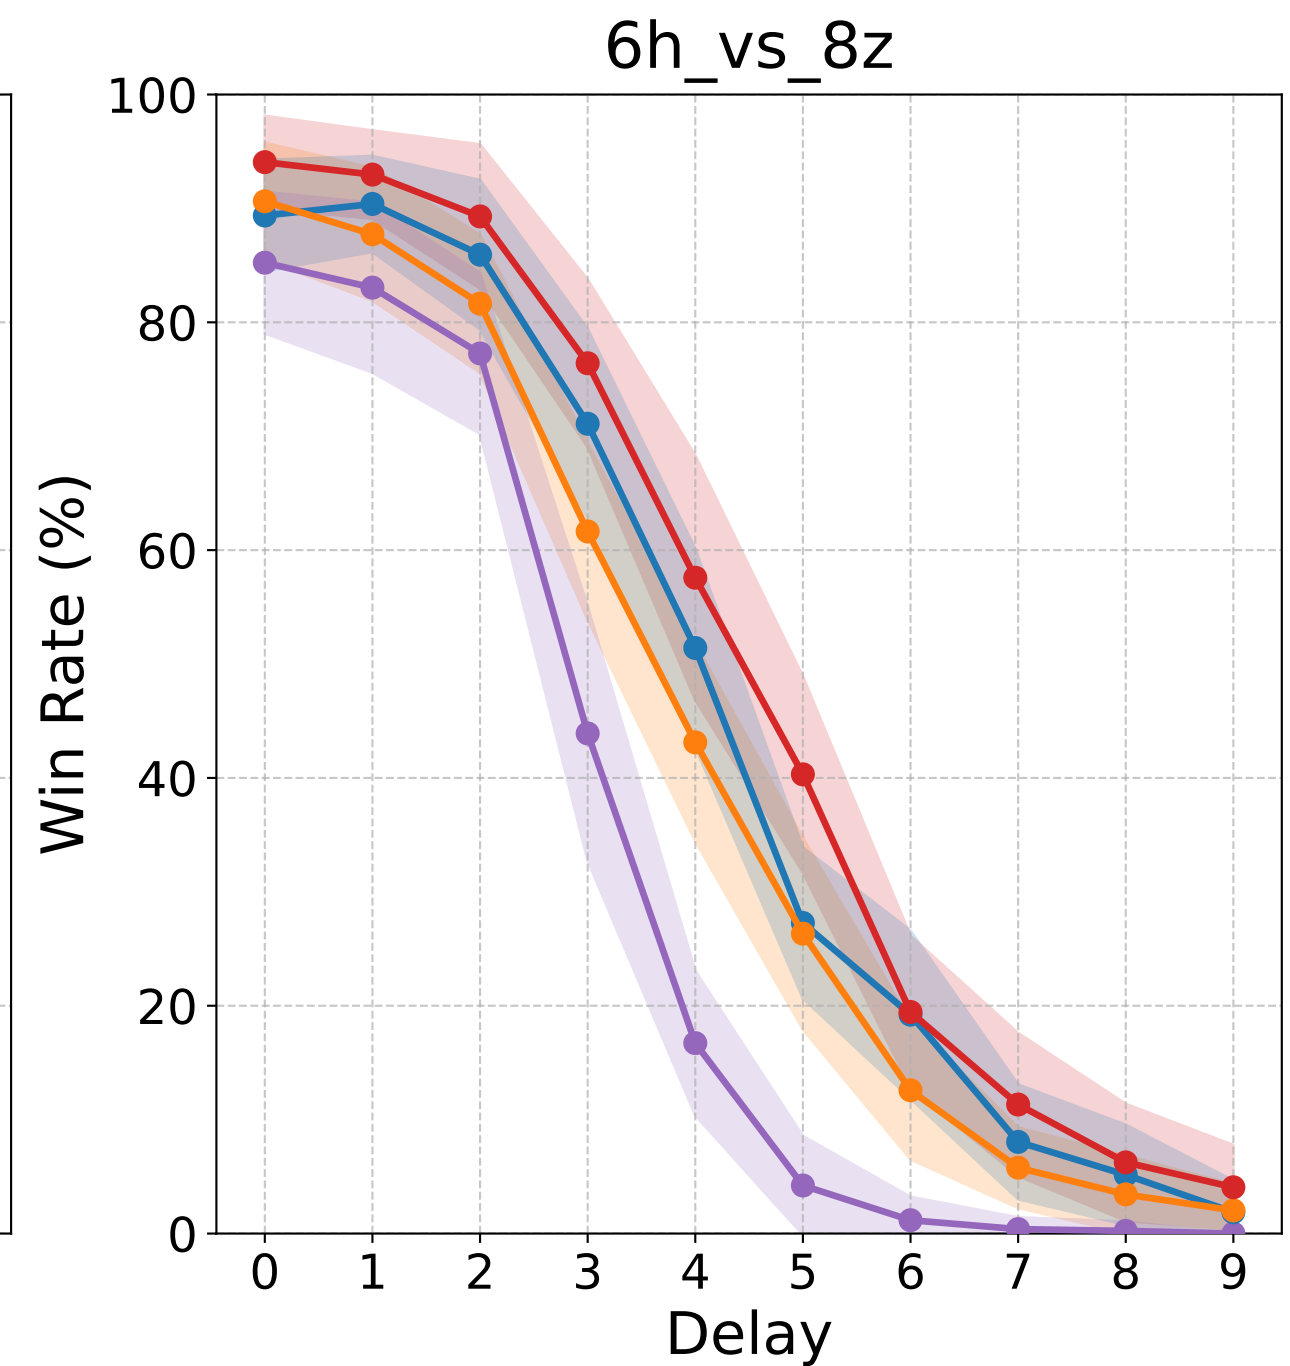

—●— QMIX(TF Echo)    —●— QMIX(TF Flash)    —●— QMIX(GRU Echo)    —●— QMIX(GRU Flash)

Supplement: supplementary_material [file FigD3.pdf › figures/FigD3.pdf]

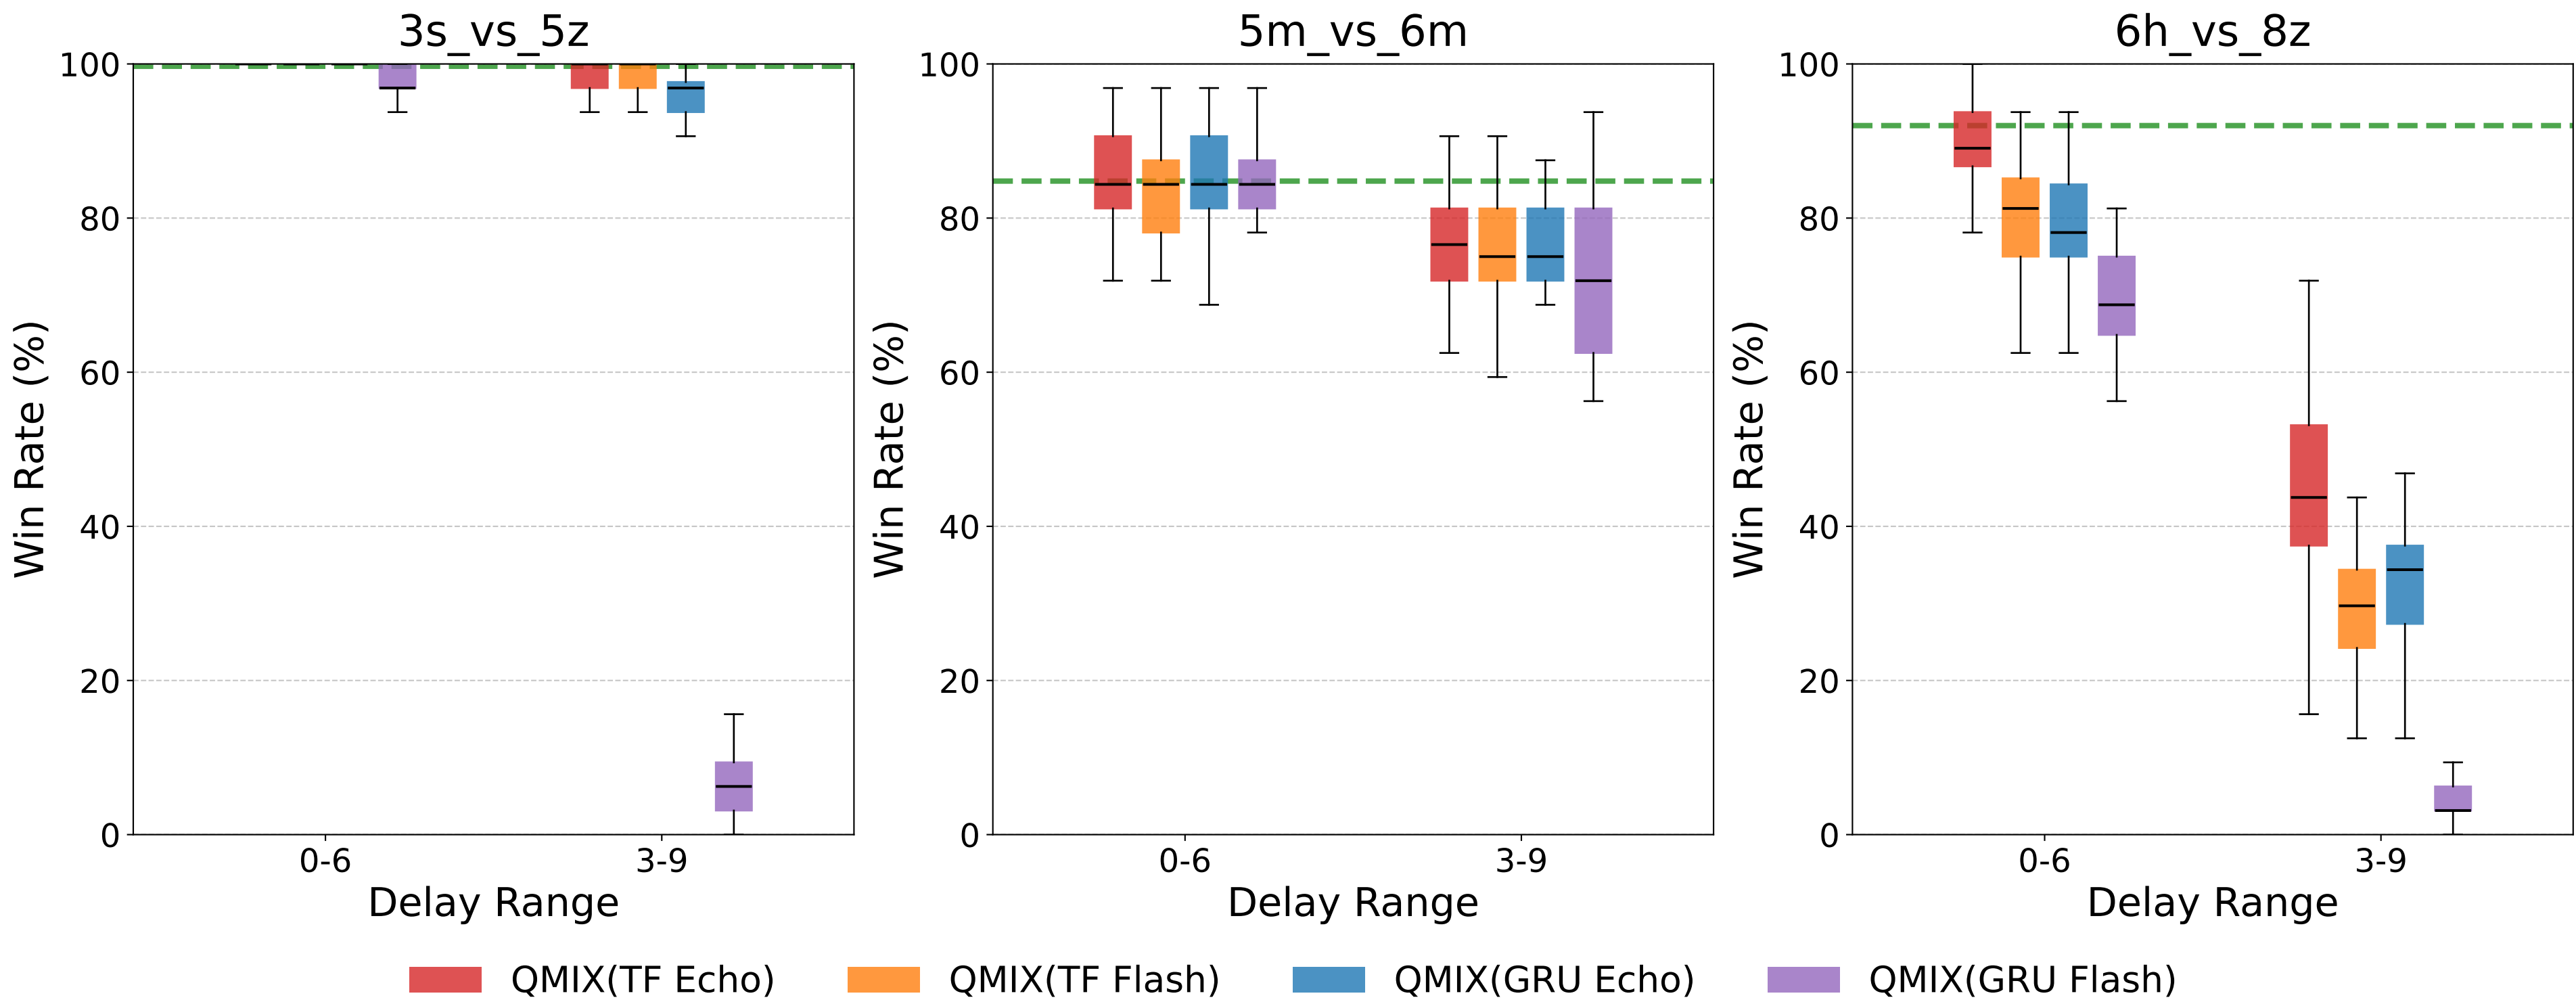

Supplement: supplementary_material [file FigD4.pdf › figures/FigD4.pdf]

TAG

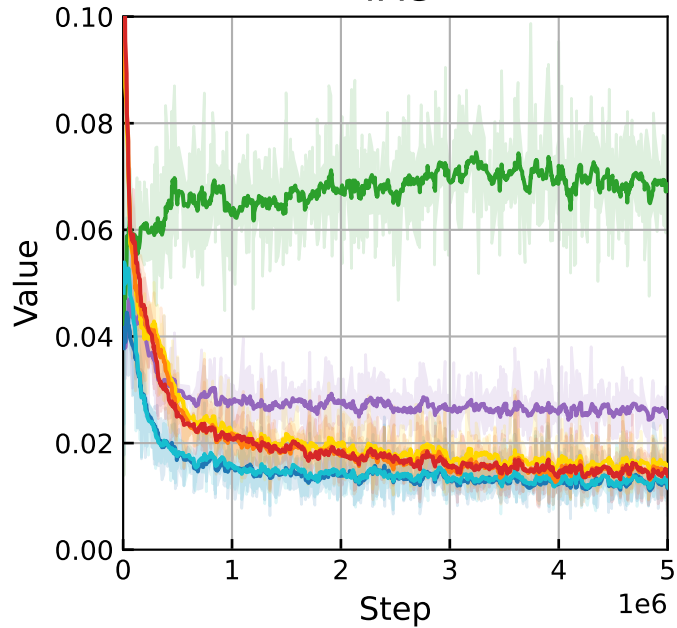

SPREAD

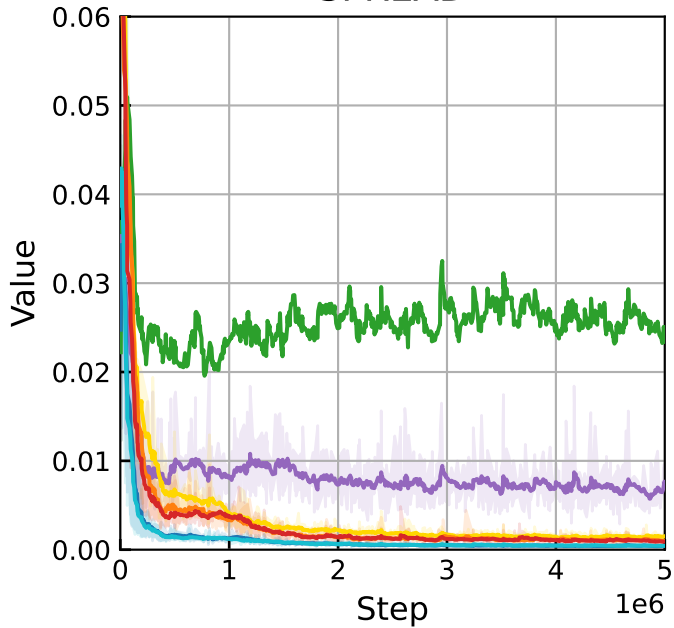

REFERENCE

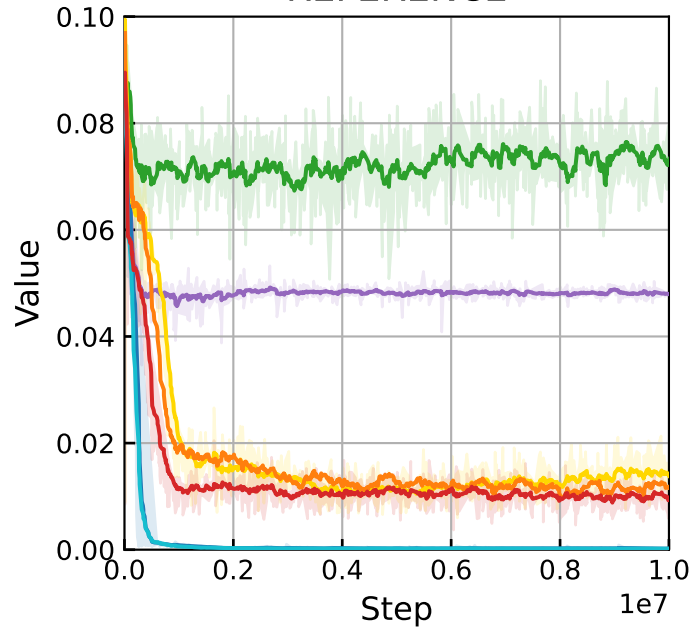

— Echo+H+DR+KD — Echo+H+DR — Echo+DR — Flash+H+DR+KD — Flash+H+DR — Flash+DR — Base

Supplement: supplementary_material [file FigD5.pdf › figures/FigD5.pdf]

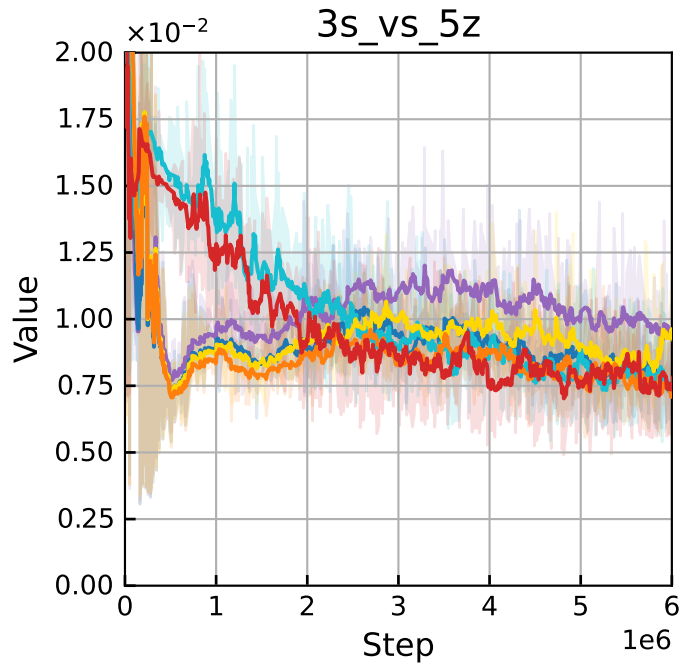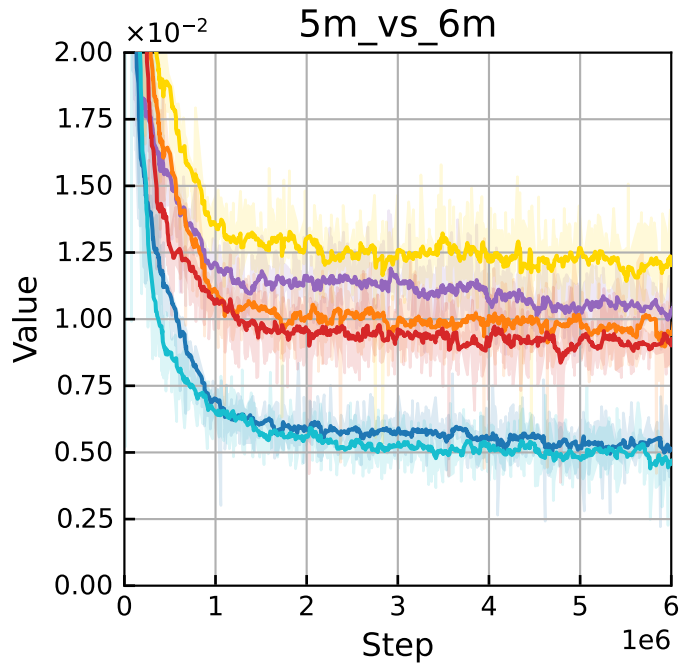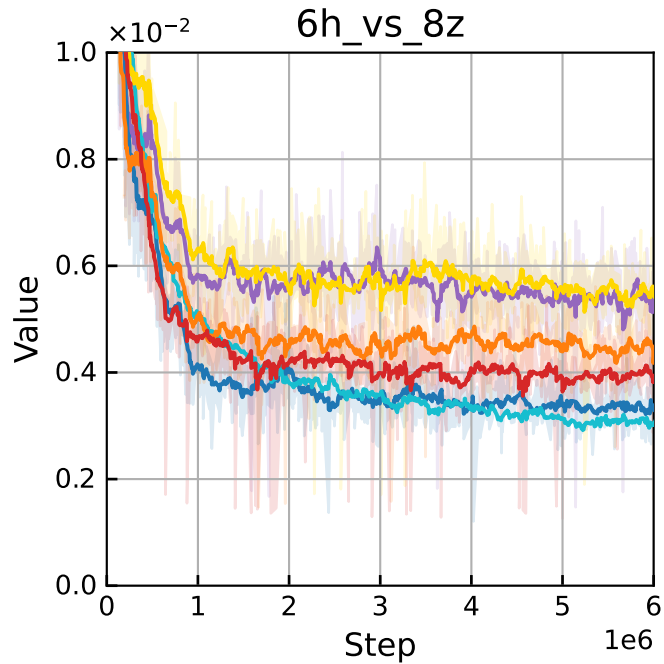

Echo+H+DR+KD

Echo+C+H+DR

Echo+C+DR

Flash+H+DR+KD

Flash+C+H+DR

Flash+C+DR

Supplement: supplementary_material [file FigD6.pdf › figures/FigD6.pdf]
